# Supplementary material for: Thieno[3,2-b]thiophene-based bridged BODIPY dimers: synthesis, electrochemistry, and one- and two-photon photophysical properties
Source: Royal Society of Chemistry journal article supplement (doi:10.1039/d4dt02655a), 2024-11-12
Supplement: d4dt02655a1.pdf [file d4dt02655a1.pdf]

# Supporting Information

---

## Thieno[3,2-*b*]thiophene-based bridged BODIPY dimers: synthesis, electrochemistry, and one- and two-photon photophysical properties

Zhiyong Chai,<sup>a</sup> Tingting Gu,<sup>a</sup> Annaelle Beau,<sup>b,c</sup> Frédéric Bolze,<sup>b</sup> Claude P. Gros,<sup>c</sup> Xu Liang,<sup>d</sup> Donghai Shi<sup>a</sup> and Haijun Xu<sup>a, e</sup>

### Table of contents

|                    |                                                          |       |
|--------------------|----------------------------------------------------------|-------|
| <b>Chart S1.</b>   | Synthetic procedures to access to compounds <b>1-3</b>   | p. 5  |
| <b>Chart S2.</b>   | Synthetic procedures to access to compounds <b>6a-6d</b> | p. 5  |
| <b>Figure S1.</b>  | <sup>1</sup> H NMR spectrum of compound <b>1</b>         | p. 5  |
| <b>Figure S2.</b>  | <sup>1</sup> H NMR spectrum of compound <b>2</b>         | p. 7  |
| <b>Figure S3.</b>  | <sup>1</sup> H NMR spectrum of compound <b>3</b>         | p. 8  |
| <b>Figure S4.</b>  | <sup>1</sup> H NMR spectrum of compound <b>4a</b>        | p.9   |
| <b>Figure S5.</b>  | <sup>1</sup> H NMR spectrum of compound <b>4b</b>        | p.10  |
| <b>Figure S6.</b>  | <sup>1</sup> H NMR spectrum of compound <b>4c</b>        | p. 11 |
| <b>Figure S7.</b>  | <sup>1</sup> H NMR spectrum of compound <b>4d</b>        | p. 12 |
| <b>Figure S8.</b>  | <sup>1</sup> H NMR spectrum of compound <b>5a</b>        | p. 13 |
| <b>Figure S9.</b>  | <sup>1</sup> H NMR spectrum of compound <b>5b</b>        | p. 14 |
| <b>Figure S10.</b> | <sup>1</sup> H NMR spectrum of compound <b>5c</b>        | p. 15 |
| <b>Figure S11.</b> | <sup>1</sup> H NMR spectrum of compound <b>5d</b>        | p. 16 |
| <b>Figure S12.</b> | <sup>1</sup> H NMR spectrum of compound <b>6a</b>        | p. 17 |
| <b>Figure S13.</b> | <sup>1</sup> H NMR spectrum of compound <b>6b</b>        | p. 18 |

|                    |                                                                         |       |
|--------------------|-------------------------------------------------------------------------|-------|
| <b>Figure S14.</b> | <sup>1</sup> H NMR spectrum of compound <b>6c</b>                       | p. 19 |
| <b>Figure S15.</b> | <sup>1</sup> H NMR spectrum of compound <b>6d</b>                       | p. 20 |
| <b>Figure S16.</b> | High Resolution ESI-Mass spectrum of compound <b>5a</b>                 | p. 21 |
| <b>Figure S17.</b> | High Resolution ESI-Mass spectrum of compound <b>5b</b>                 | p. 21 |
| <b>Figure S18.</b> | High Resolution ESI-Mass spectrum of compound <b>5c</b>                 | p. 22 |
| <b>Figure S19.</b> | High Resolution ESI-Mass spectrum of compound <b>5d</b>                 | p. 22 |
| <b>Figure S20.</b> | MALDI-TOF MS spectrum of compound <b>6a</b>                             | p. 23 |
| <b>Figure S21.</b> | MALDI-TOF MS spectrum of compound <b>6b</b>                             | p. 24 |
| <b>Figure S22.</b> | MALDI-TOF MS spectrum of compound <b>6c</b>                             | p. 25 |
| <b>Figure S23.</b> | MALDI-TOF MS spectrum of compound <b>6d</b>                             | p. 26 |
| <b>Figure S24.</b> | UV-vis spectra of compound <b>4a</b> in different solvents              | p. 27 |
| <b>Figure S25.</b> | UV-vis spectra of compound <b>4b</b> in different solvents              | p. 27 |
| <b>Figure S26.</b> | UV-vis spectra of compound <b>4c</b> in different solvents              | p. 28 |
| <b>Figure S27.</b> | UV-vis spectra of compound <b>4d</b> in different solvents              | p. 28 |
| <b>Figure S28.</b> | UV-vis spectra of compound <b>6a</b> in different solvents              | p. 29 |
| <b>Figure S29.</b> | UV-vis spectra of compound <b>6b</b> in different solvents              | p. 29 |
| <b>Figure S30.</b> | UV-vis spectra of compound <b>6c</b> in different solvents              | p. 30 |
| <b>Figure S31.</b> | UV-vis spectra of compound <b>6d</b> in different solvents              | p. 30 |
| <b>Figure S32.</b> | Normalized Emission spectra of compound <b>4a</b> in different solvents | p. 31 |
| <b>Figure S33.</b> | Normalized Emission spectra of compound <b>4b</b> in different solvents | p. 31 |
| <b>Figure S34.</b> | Normalized Emission spectra of compound <b>4c</b> in different solvents | p. 32 |
| <b>Figure S35.</b> | Normalized Emission spectra of compound <b>4d</b> in different solvents | p. 32 |
| <b>Figure S36.</b> | Normalized Emission spectra of compound <b>6a</b> in different solvents | p. 33 |
| <b>Figure S37.</b> | Normalized Emission spectra of compound <b>6b</b> in different solvents | p. 33 |

|                    |                                                                                   |       |
|--------------------|-----------------------------------------------------------------------------------|-------|
| <b>Figure S38.</b> | Normalized Emission spectra of compound <b>6c</b> in different solvents           | p. 34 |
| <b>Figure S39.</b> | Normalized Emission spectra of compound <b>6d</b> in different solvents           | p. 34 |
| <b>Figure S40.</b> | UV-vis spectra of compound <b>6c</b> in different concentrations                  | p. 35 |
| <b>Figure S41.</b> | UV-vis spectra of compound <b>6d</b> in different concentrations                  | p. 35 |
| <b>Figure S42.</b> | Cyclic voltammograms of compounds <b>4a-4d</b> in CH <sub>2</sub> Cl <sub>2</sub> | p. 36 |
| <b>Figure S43.</b> | DPV of compound <b>4a-4d</b>                                                      | p. 37 |
| <b>Figure S44.</b> | DPV of compound <b>6a</b>                                                         | p. 37 |
| <b>Figure S45.</b> | DPV of compound <b>6b</b>                                                         | p. 38 |
| <b>Figure S46.</b> | DPV of compound <b>6c</b>                                                         | p. 38 |
| <b>Figure S47.</b> | DPV of compound <b>6d</b>                                                         | p. 39 |

## 1. Experimental section

### 1.1. General

All chemicals and solvents were of analytical reagent grade and used as received unless otherwise noted. Solvents for reactions were purified and dried according to standard procedures, and then distilled before use. All mixtures of solvents are given in v/v ratio.  $^1\text{H}$  NMR spectra were collected on Bruker DRX-400 AVANCE III and Bruker DRX-600 AVANCE III spectrometers. Chemical shifts for  $^1\text{H}$  NMR spectra were recorded in ppm relative to  $\text{CDCl}_3$  ( $\delta = 7.26$  ppm) or  $\text{DMSO-}d_6$  ( $\delta = 2.5$  ppm) as the internal standard. Mass spectra data were obtained using a Bruker Microflex LRF MALDI-TOF spectrometer.

### 1.2. Spectroscopic measurements

UV-vis spectra were carried out on a Shimadzu UV-3100 spectrophotometer. All the Spectra and PLQY were measured in FluoroLog-UltraFast (HORIBA Instrument Inc, Edison) equipped with a 450 W CW xenon lamp and an Open-Electrode TECooled CCD Detector (Syn-cerity). Absorption and emission measurements were carried out in 1x1 cm quartz cuvettes with spectroscopic grade solvent, and was kept constant at  $(298 \pm 2)$  K. An integrating sphere mounted in sample compartment directly for PLQY measure. Nanosecond lifetime and TRES studies were conducted using a TCSPC MCA model equipped with a picosecond photo detector ( $<200$  ps) (PPD850) and picosecond laser (duration is 180 ps, Deltadiode, 100 MHz laser). TRES data were measured by incrementing the monochromator on the emission channel of the time-resolved fluorometer in fixed wavelength intervals at each wavelength. Slices of data were taken in the intensity-wavelength plane to obtain spectra at different times during the decay. Microsecond life-time decays were collected by a MCS mode on TCSPC HUB (DeltaHUB) with a LED source (SpectraLED) as a sample excitation source.

### 1.3. Two-photon spectroscopy

The two-photon absorption spectra were recorded using the fluorescence induced method as described previously using an Insight SpectraPhysic fs pulsed laser. Rhodamine B (800-900 and 950-1000 nm;  $\Phi = 69\%$ ), Fluorescein (900-950 nm;  $\Phi =$

95%) and Styryl 9M (950-1000 nm;  $\Phi = 24\%$ ) were used as reference at  $10^{-4}$  M as for the sample of interest. Values were collected from 800 nm to 1000 nm with a power varying from 80 to 180 mW with verification of the quadratic power dependency.

#### 1.4. Electrochemistry

Cyclic voltammetry was measured on a CHI-730C Electrochemical Workstation at room temperature. A homemade three-electrode cell with a glassy carbon working electrode, a platinum wire counter electrode and a saturated calomel reference electrode (SCE) was used to do the measurement.

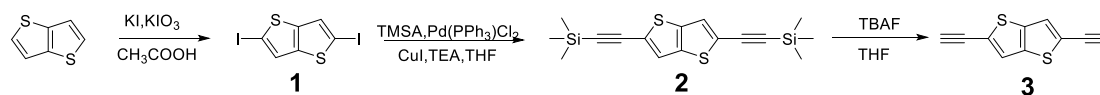

**Chart S1.** Synthetic procedures to access to compounds **1-3**

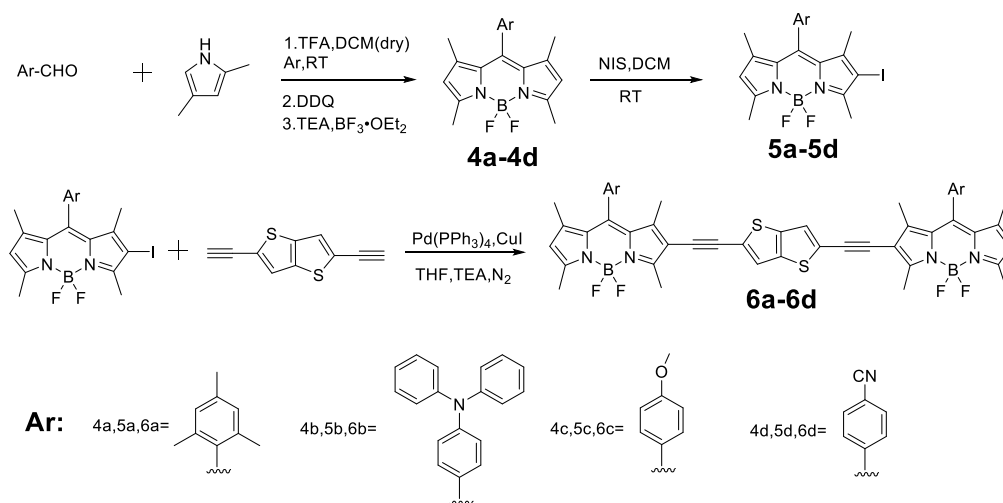

**Chart S2.** Synthetic procedures to access to compounds **6a-6d**

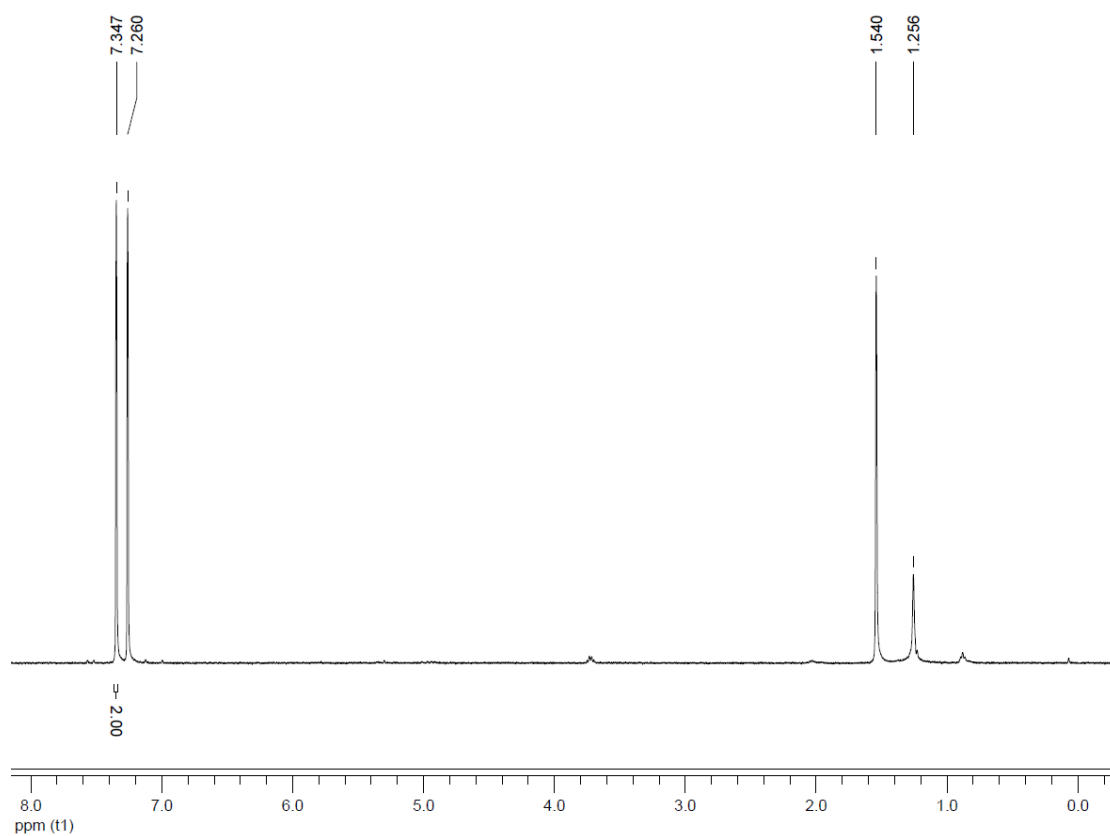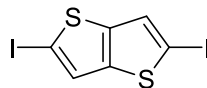

Chemical Formula:  $C_6H_2I_2S_2$

Exact Mass: 391.7687

Molecular Weight: 392.0109

**Fig. S1.**  $^1H$  NMR spectrum of compound **1** ( $CDCl_3$ , 400 MHz)

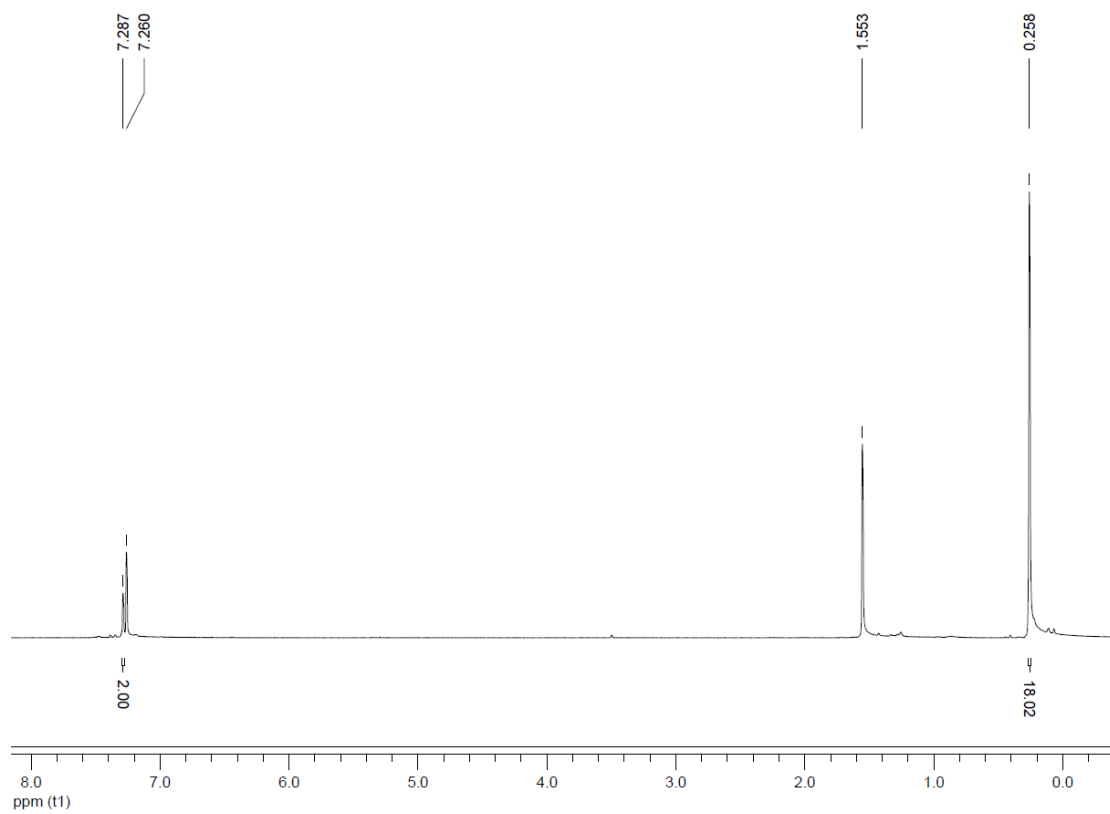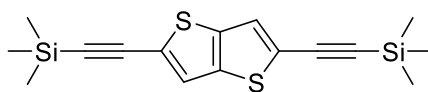

Chemical Formula:  $C_{16}H_{20}S_2Si_2$

Exact Mass: 332.0545

Molecular Weight: 332.6260

**Fig. S2.**  $^1H$  NMR spectrum of compound **2** ( $CDCl_3$ , 400 MHz)

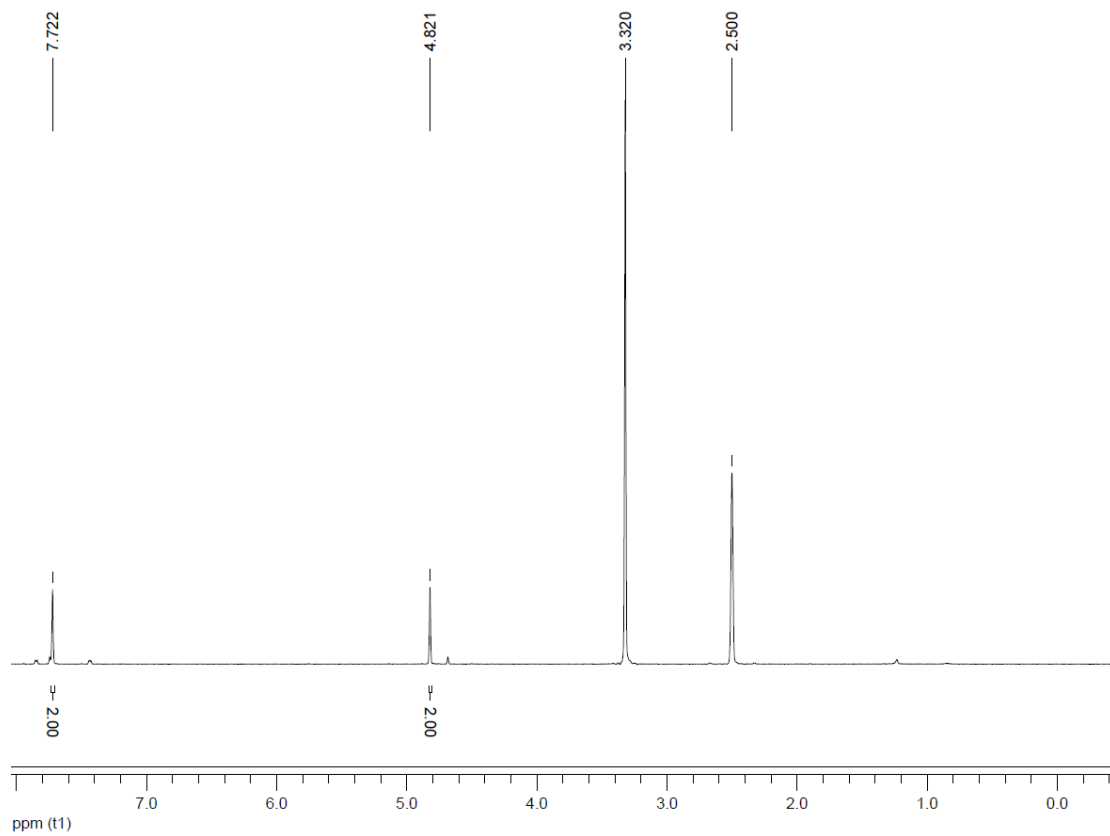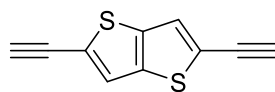

Chemical Formula: C<sub>10</sub>H<sub>4</sub>S<sub>2</sub>  
Exact Mass: 187.9754  
Molecular Weight: 188.2620

**Fig. S3.** <sup>1</sup>H NMR spectrum of compound **3** (DMSO, 400 MHz)



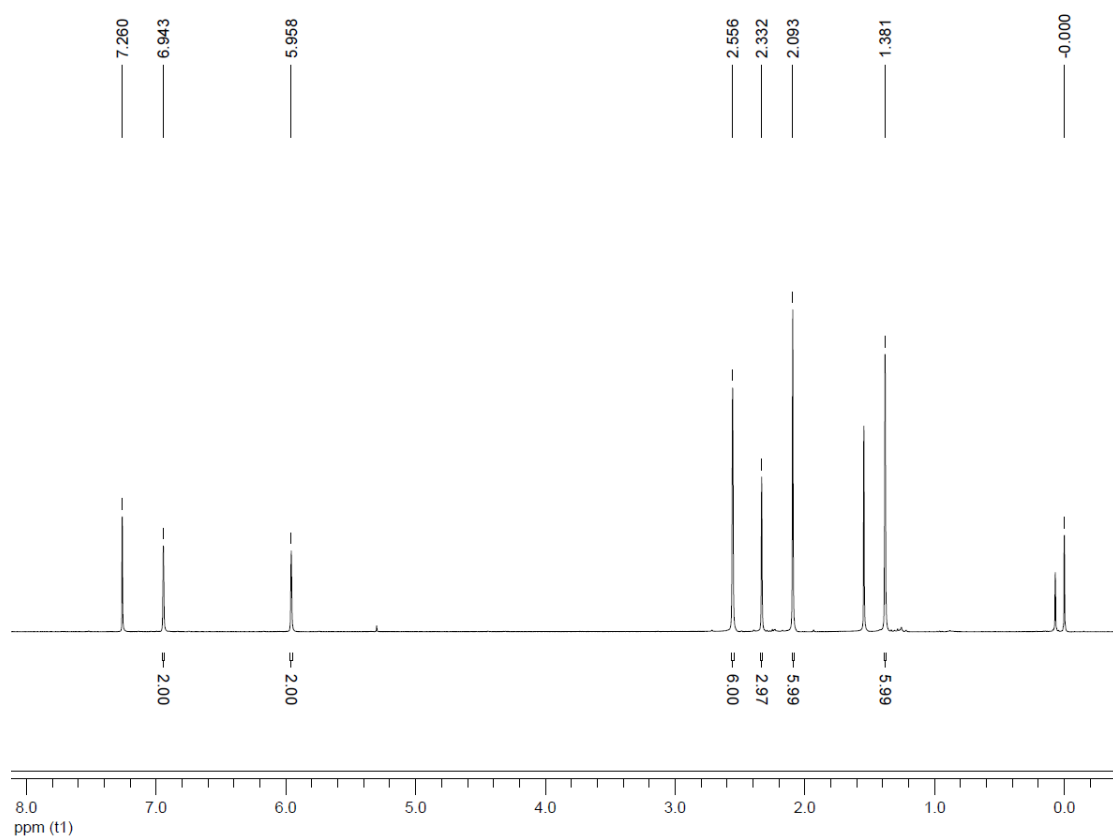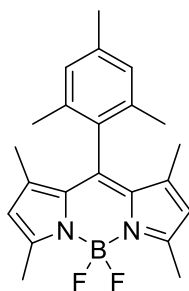

Chemical Formula:  $C_{22}H_{25}BF_2N_2$

Exact Mass: 366.2079

Molecular Weight: 366.2628

**Fig. S4.**  $^1H$  NMR spectrum of compound **4a** ( $CDCl_3$ , 400 MHz)

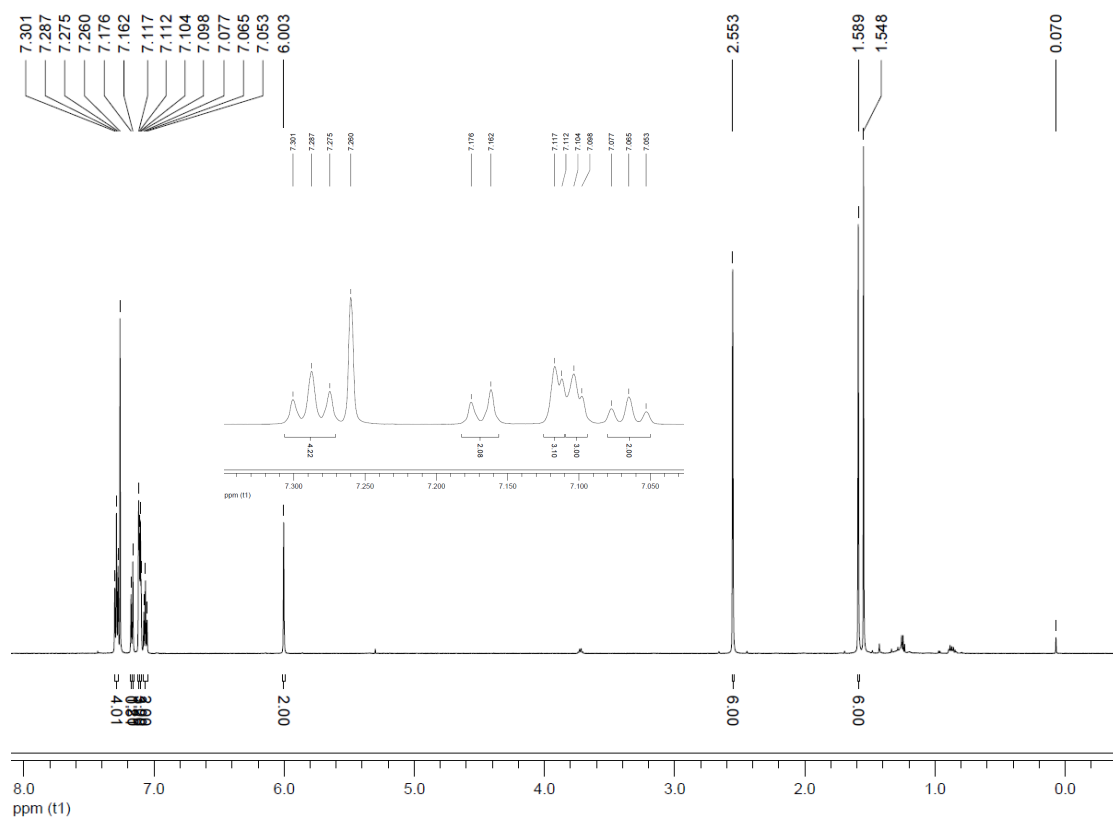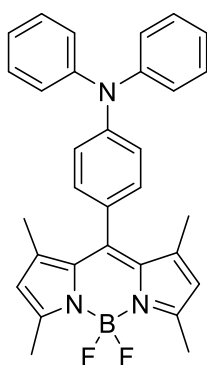

Chemical Formula:  $C_{31}H_{28}BF_2N_3$

Exact Mass: 491.2344

Molecular Weight: 491.3928

**Fig. S5.**  $^1H$  NMR spectrum of compound **4b** ( $CDCl_3$ , 600MHz)

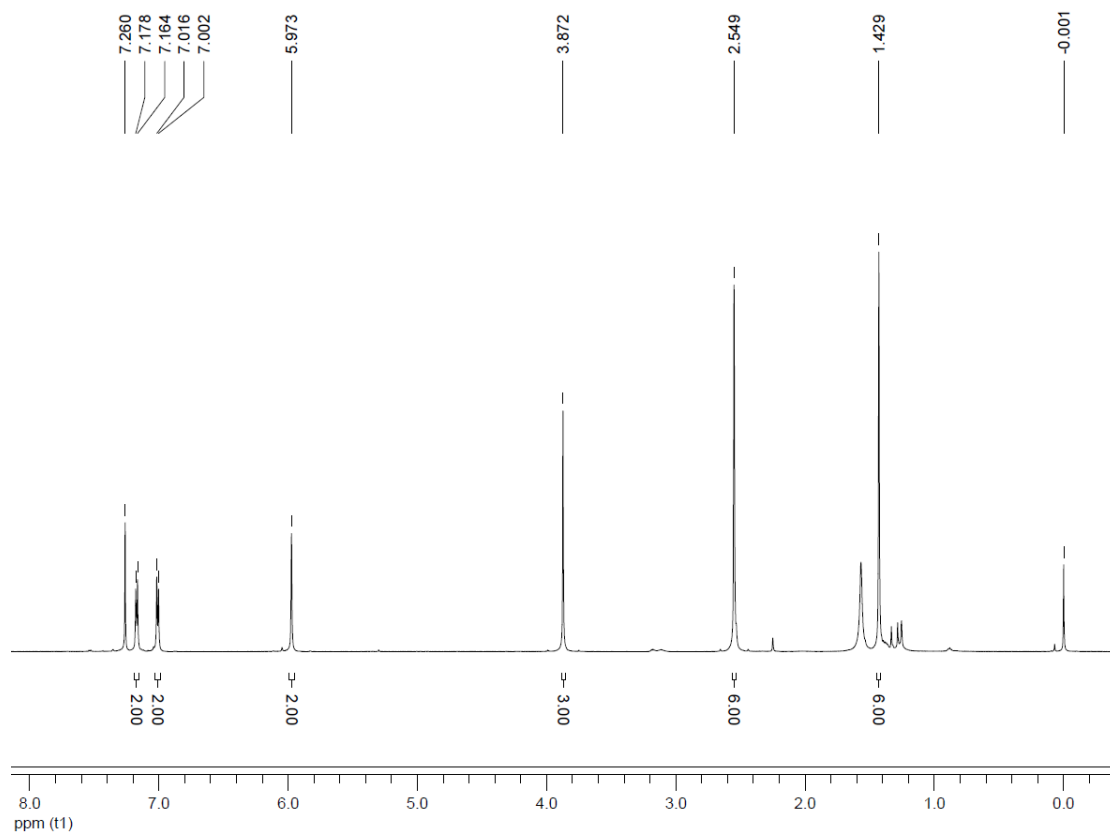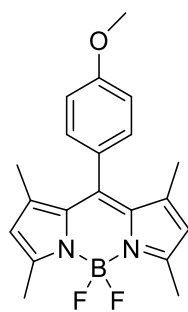

Chemical Formula:

$C_{20}H_{21}BF_2N_2O$

Exact Mass: 354.1715

Molecular Weight: 354.2078

**Fig. S6.**  $^1H$  NMR spectrum of compound **4c** ( $CDCl_3$ , 600 MHz)

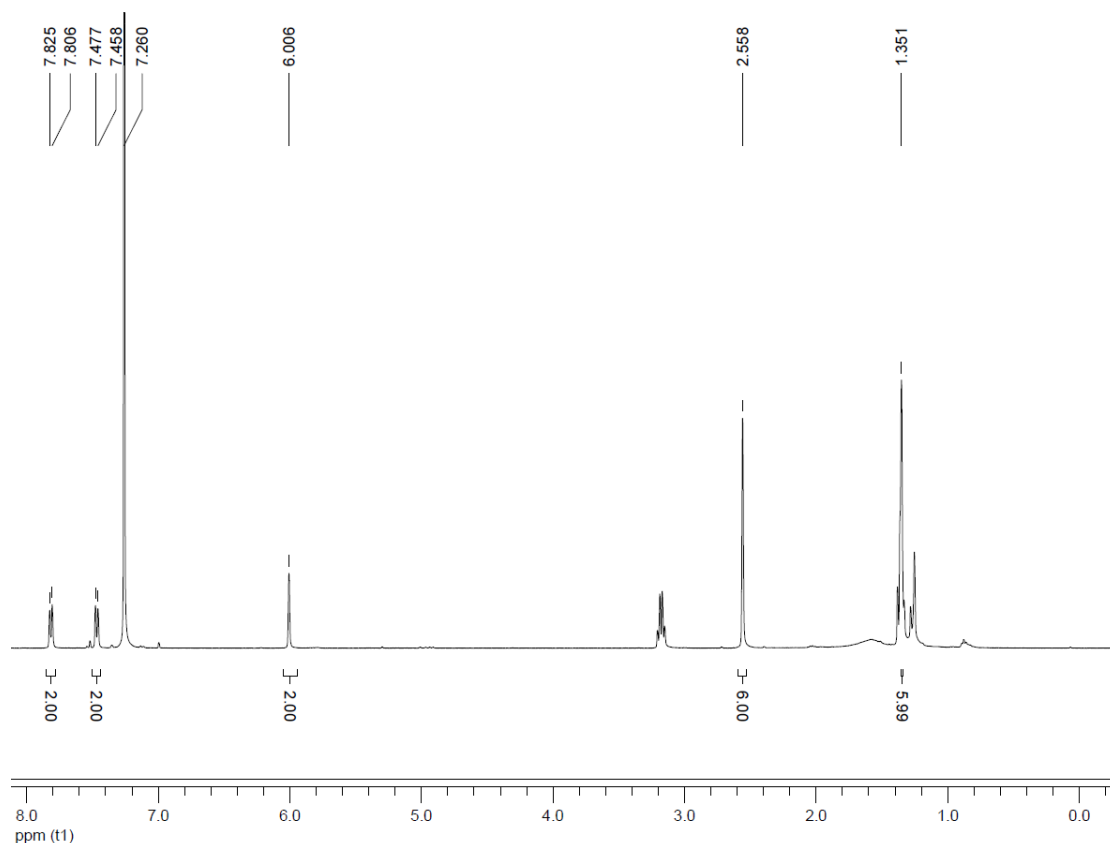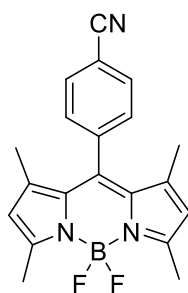

Chemical Formula:  
 $C_{20}H_{18}BF_2N_3$   
 Exact Mass: 349.1562  
 Molecular Weight:  
 349.1918

**Fig. S7.**  $^1H$  NMR spectrum of compound **4d** ( $CDCl_3$ , 400 MHz)

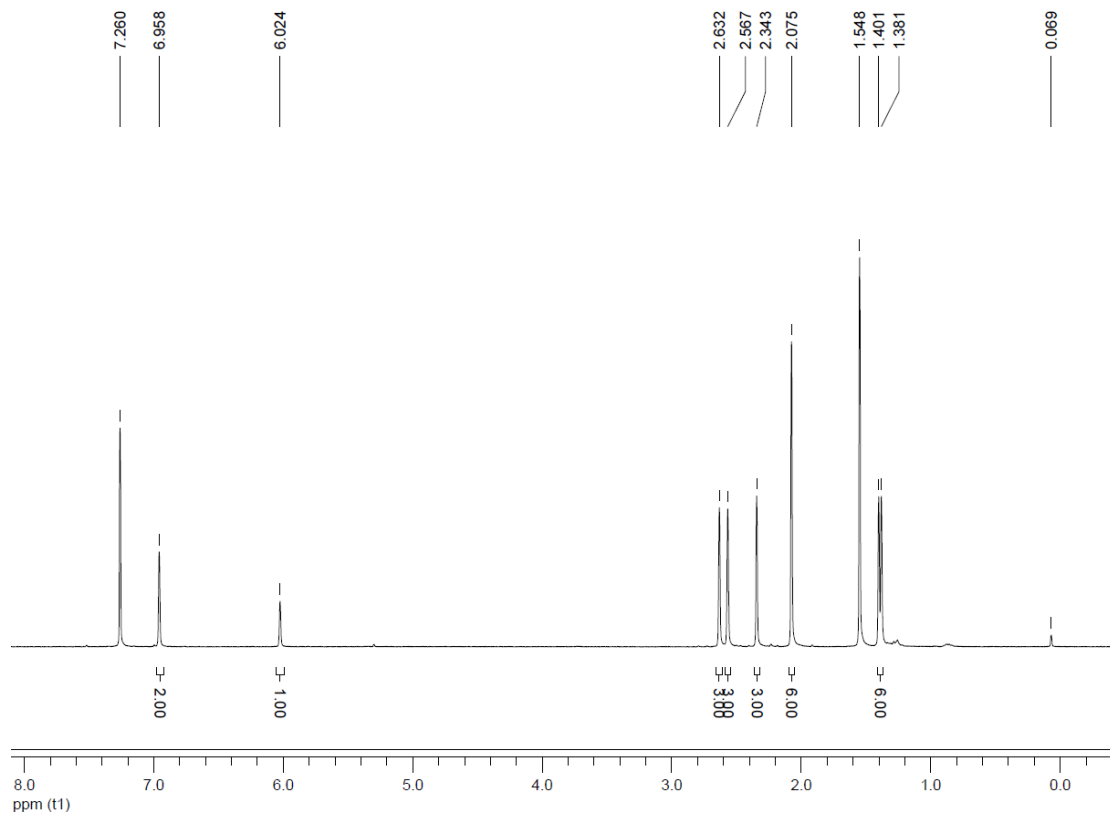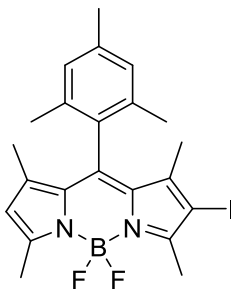

Chemical Formula:  $C_{22}H_{24}BF_2IN_2$

Exact Mass: 492.1045

Molecular Weight: 492.1593

**Fig. S8.**  $^1H$  NMR spectrum of compound **5a** ( $CDCl_3$ , 400 MHz)

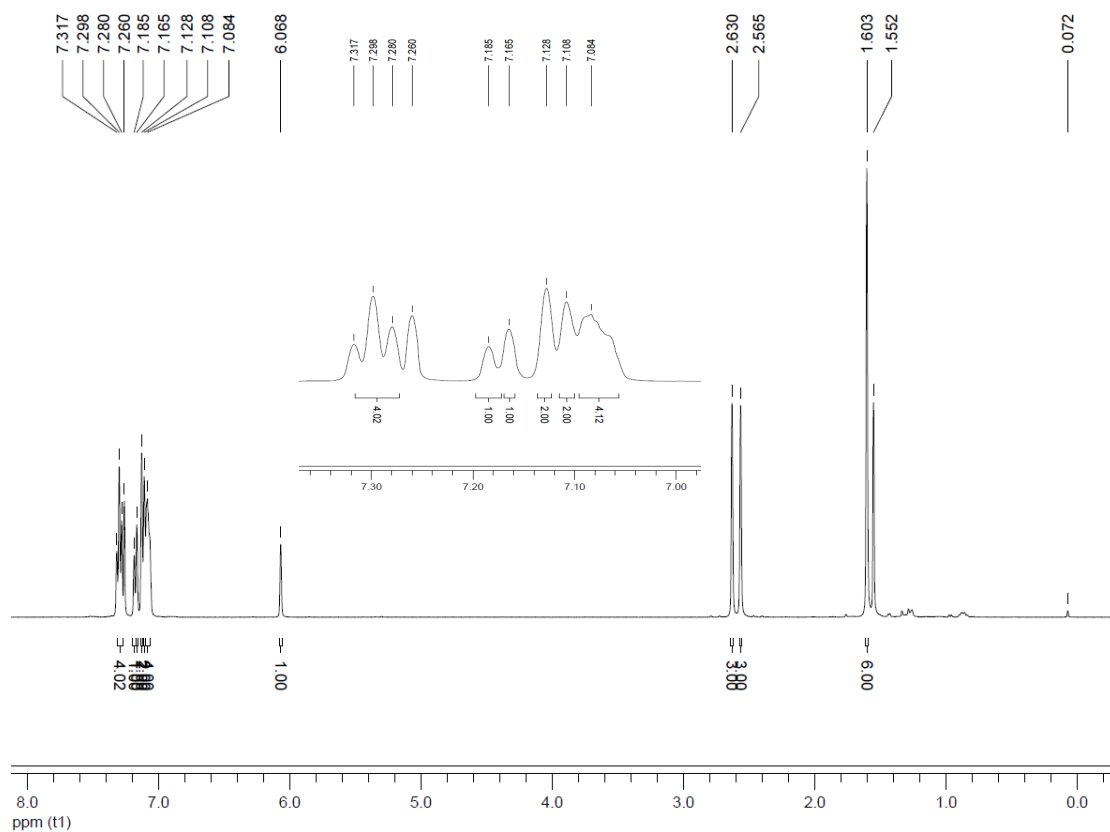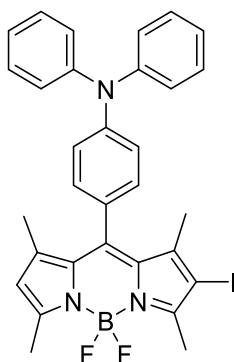

Chemical Formula:  $C_{31}H_{27}BF_2IN_3$

Exact Mass: 617.1311

Molecular Weight: 617.2893

**Fig. S9.**  $^1H$  NMR spectrum of compound **5b** ( $CDCl_3$ , 600 MHz)

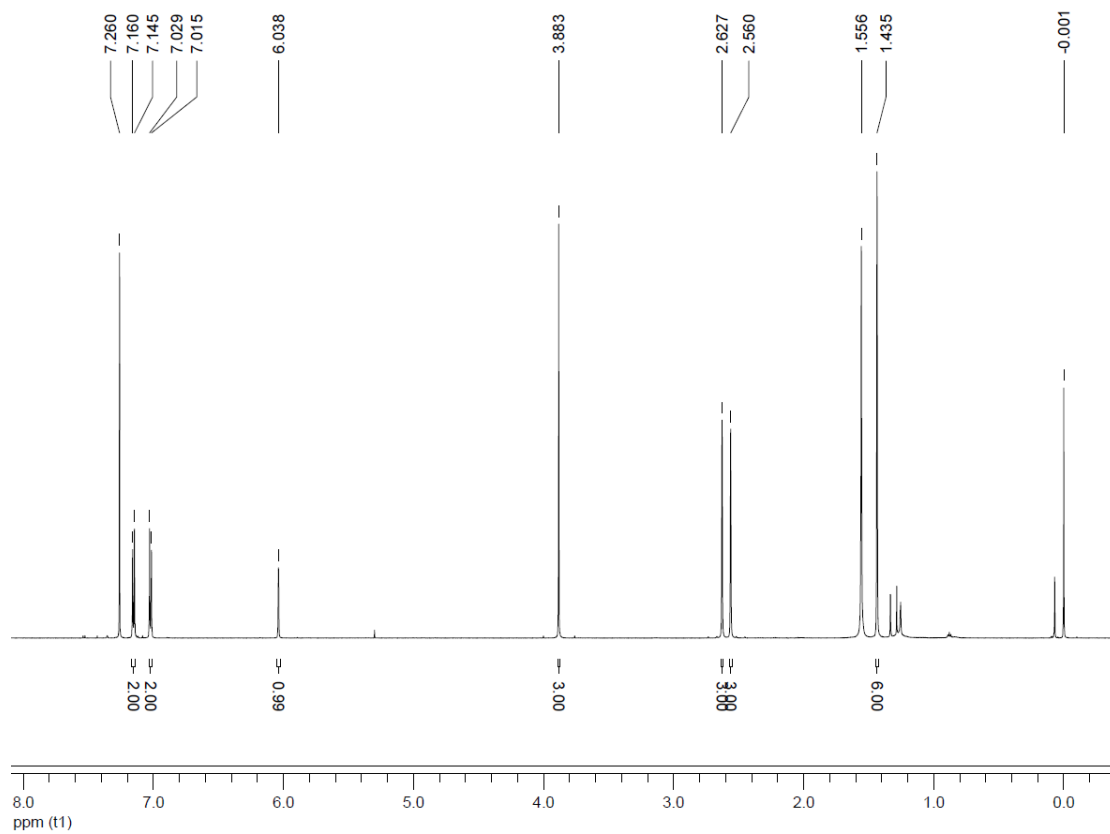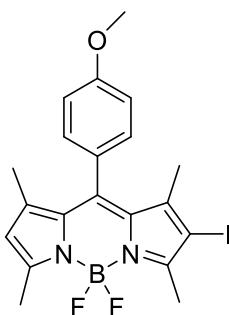

Chemical Formula:  $C_{20}H_{20}BF_2IN_2O$

Exact Mass: 480.0681

Molecular Weight: 480.1043

**Fig. S10.**  $^1H$  NMR spectrum of compound **5c** ( $CDCl_3$ , 600 MHz)

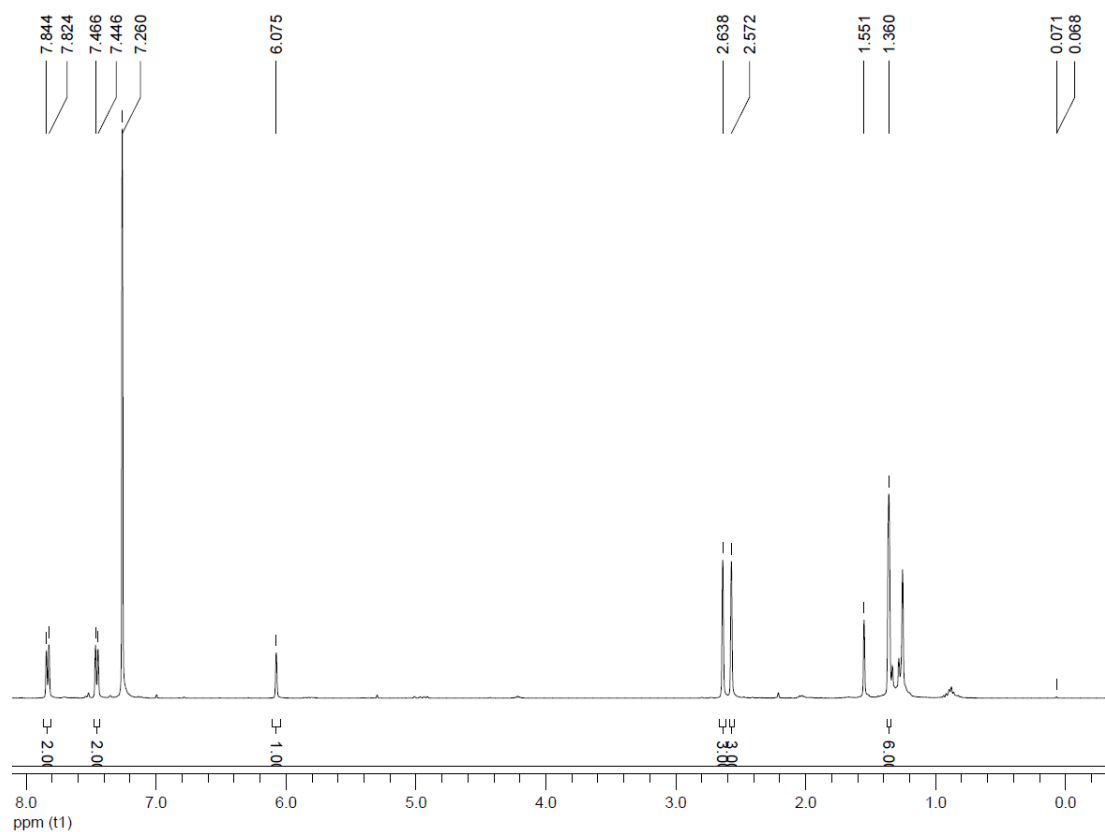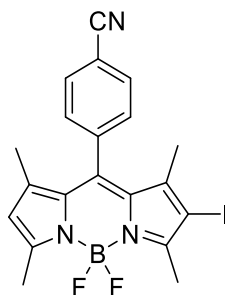

Chemical Formula:  $C_{20}H_{17}BF_2IN_3$

Exact Mass: 475.0528

Molecular Weight: 475.0883

**Fig. S11.**  $^1H$  NMR spectrum of compound **5d** ( $CDCl_3$ , 600 MHz)



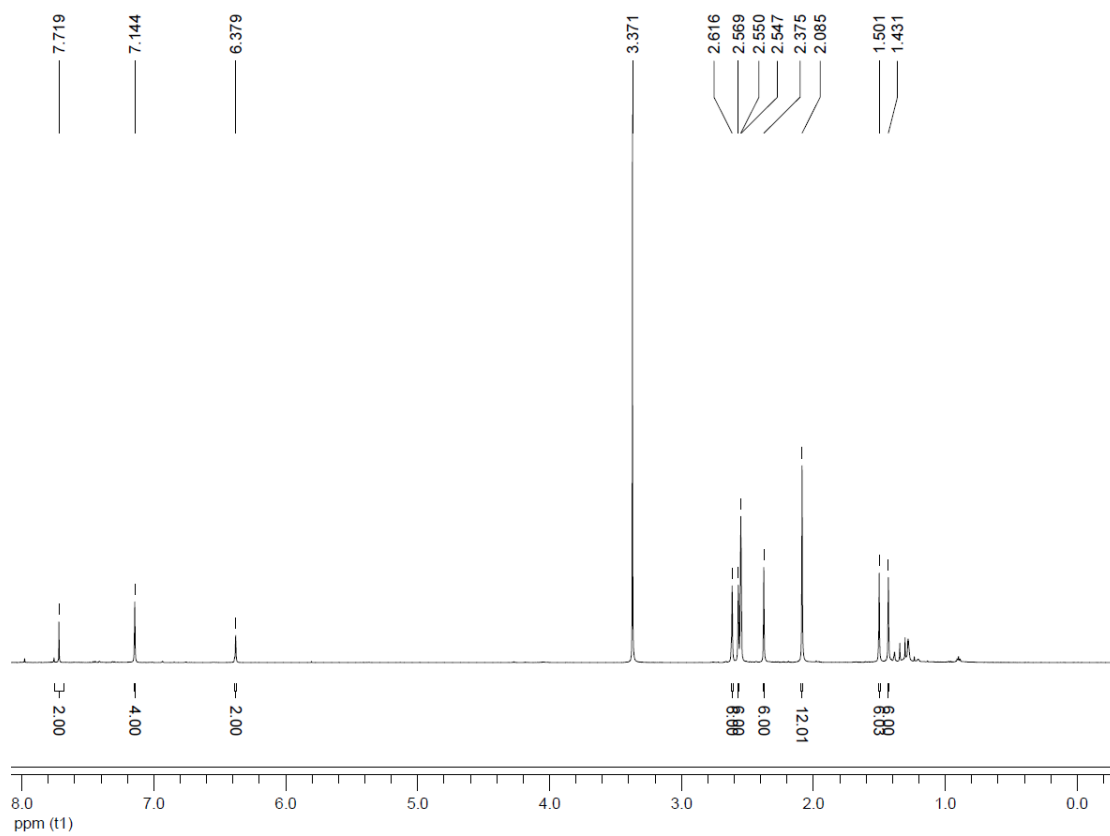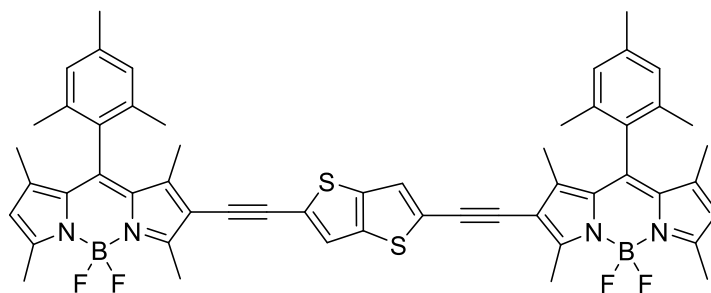

Chemical Formula:  $C_{54}H_{50}B_2F_4N_4S_2$

Exact Mass: 916.3599

Molecular Weight: 916.7556

**Fig. S12.**  $^1H$  NMR spectrum of compound **6a** (DMSO, 600 MHz)

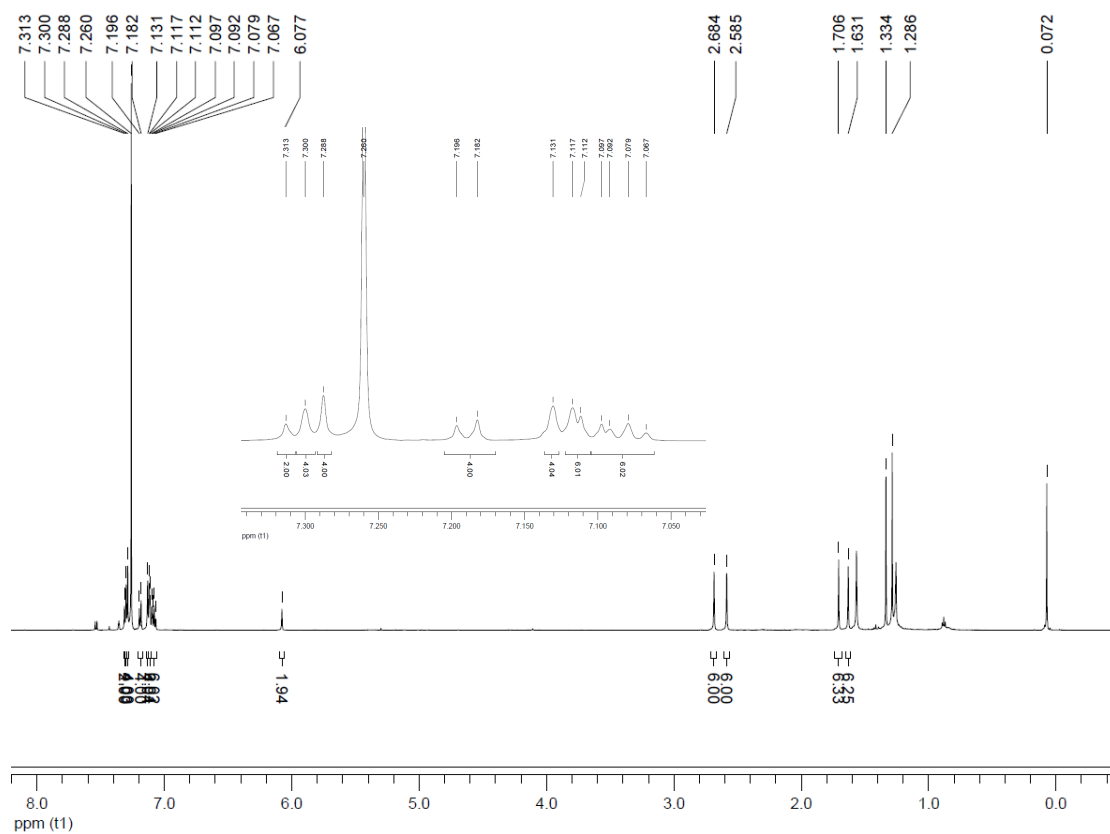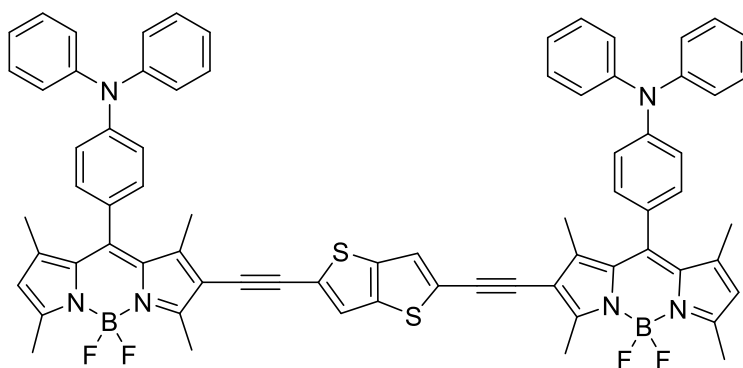

Chemical Formula:  $C_{72}H_{56}B_2F_4N_6S_2$

Exact Mass: 1166.4130

Molecular Weight: 1167.0156

**Fig. S13.**  $^1H$  NMR spectrum of compound **6b** ( $CDCl_3$ , 600 MHz)

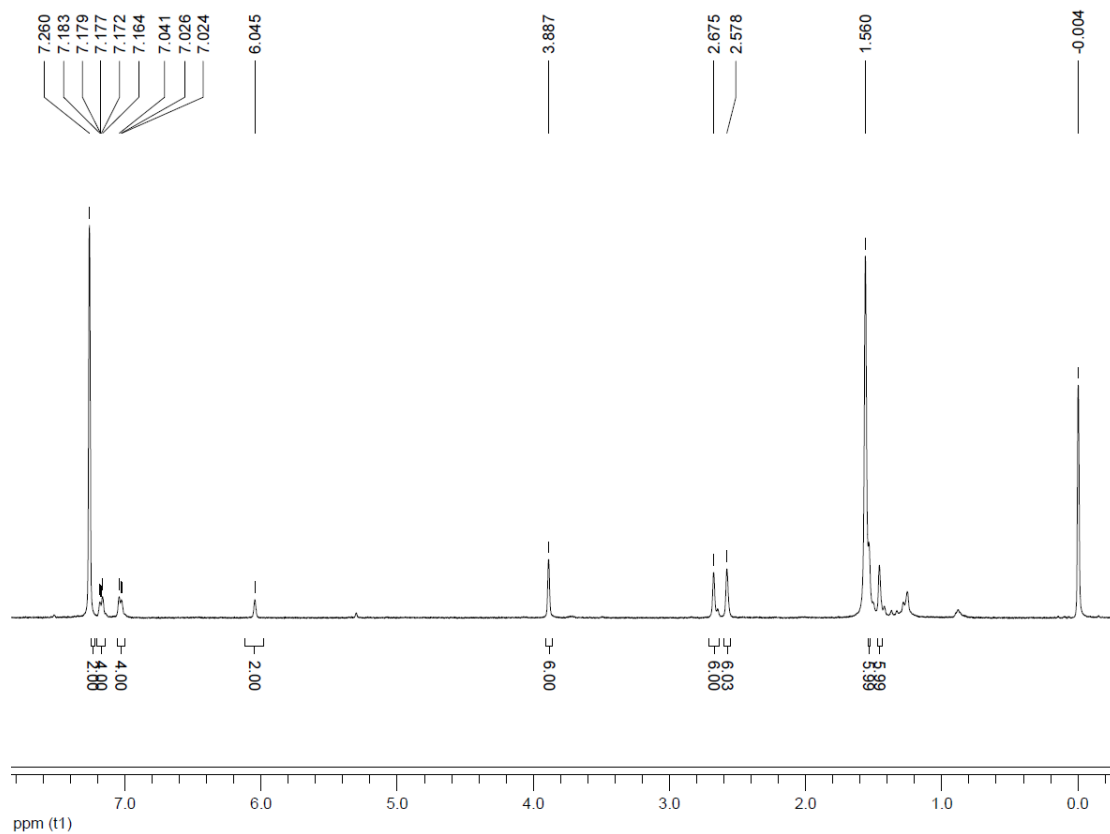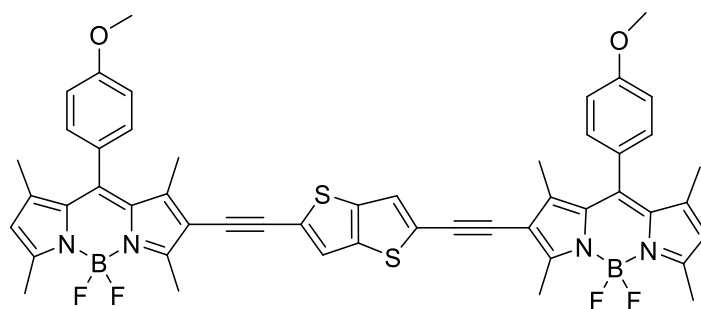

Chemical Formula:  $C_{50}H_{42}B_2F_4N_4O_2S_2$

Exact Mass: 892.2871

Molecular Weight: 892.6456

**Fig. S14.**  $^1H$  NMR spectrum of compound **6c** ( $CDCl_3$ , 600 MHz)

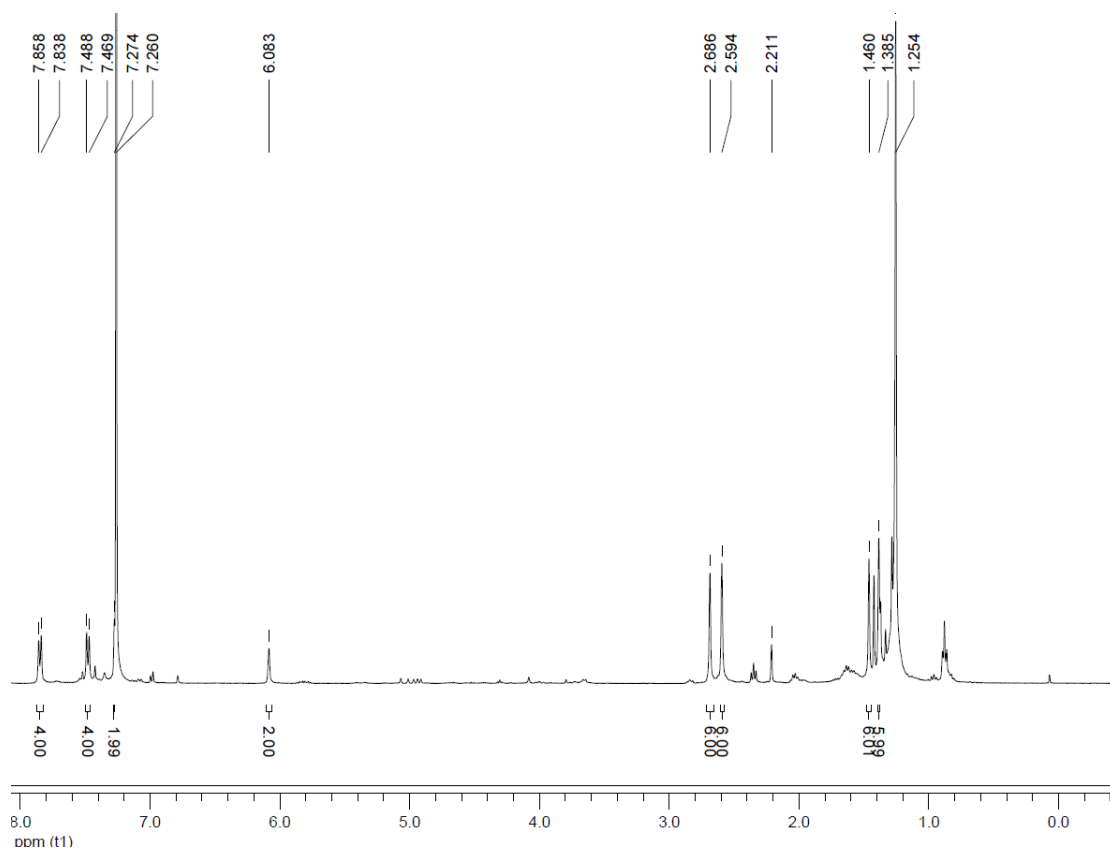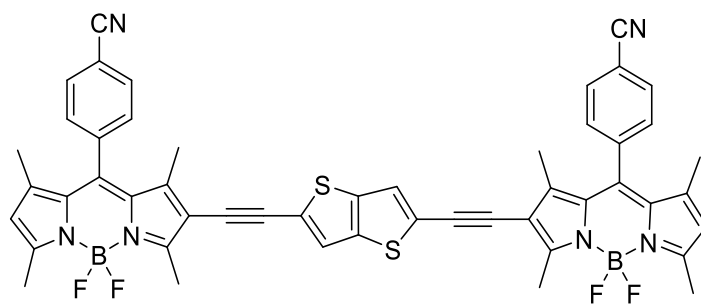

Chemical Formula:  $C_{50}H_{36}B_2F_4N_6S_2$

Exact Mass: 882.2565

Molecular Weight: 882.6136

**Fig. S15.**  $^1H$  NMR spectrum of compound **6d** ( $CDCl_3$ , 400 MHz)

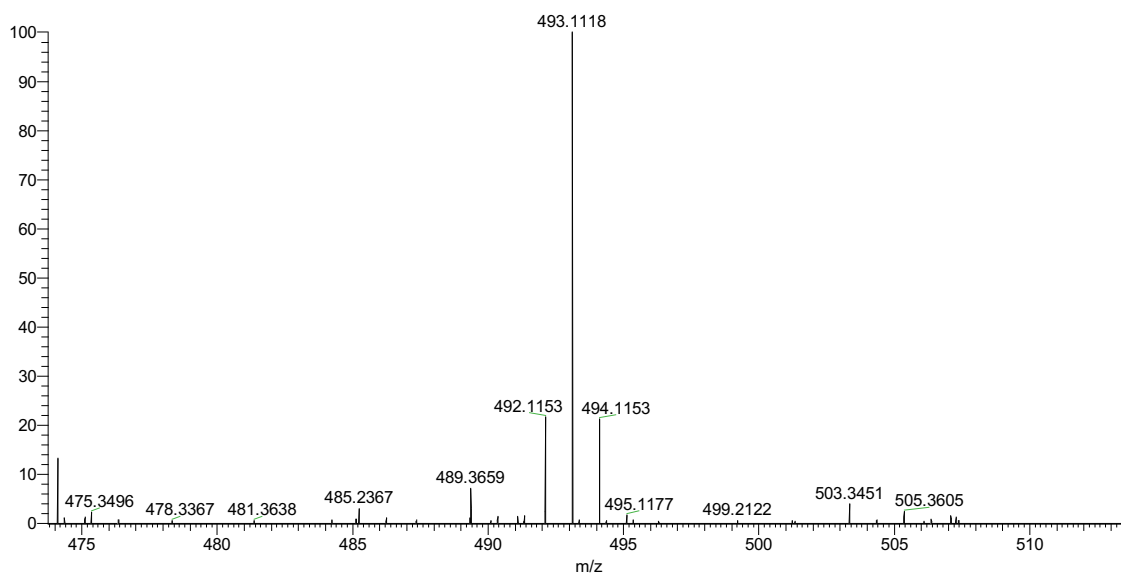

**Fig. S16.** High Resolution ESI-Mass spectrum of compound **5a**

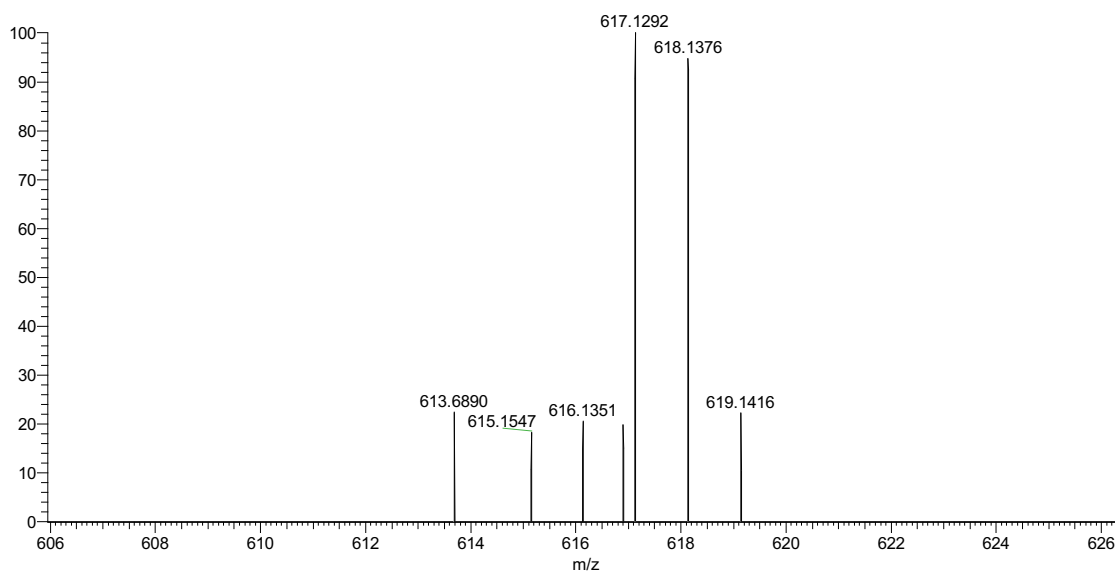

**Fig. S17.** High Resolution ESI-Mass spectrum of compound **5b**

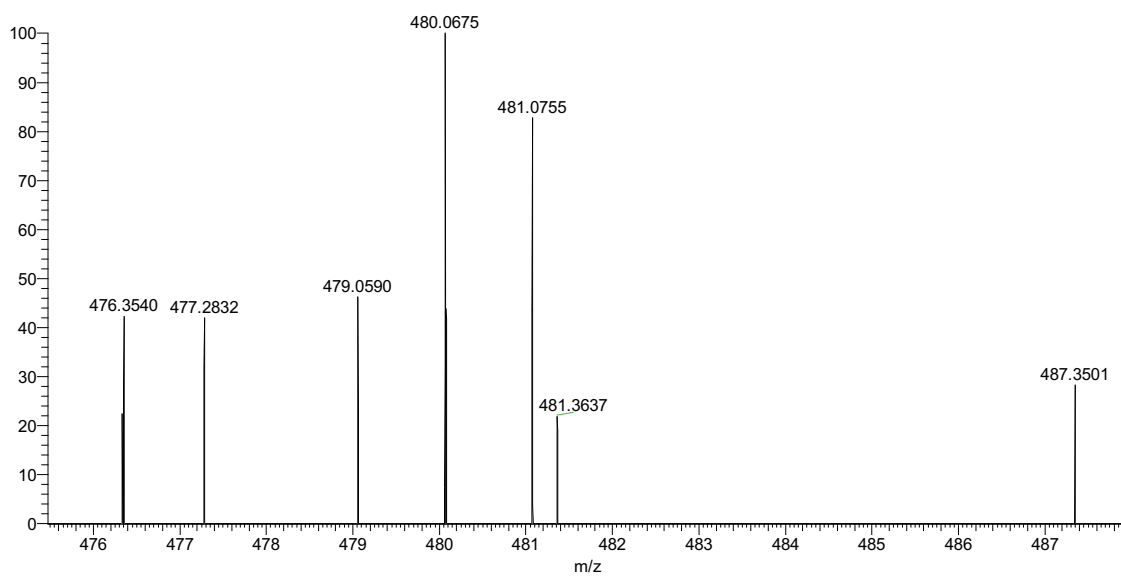

**Fig. S18.** High Resolution ESI-Mass spectrum of compound **5c**

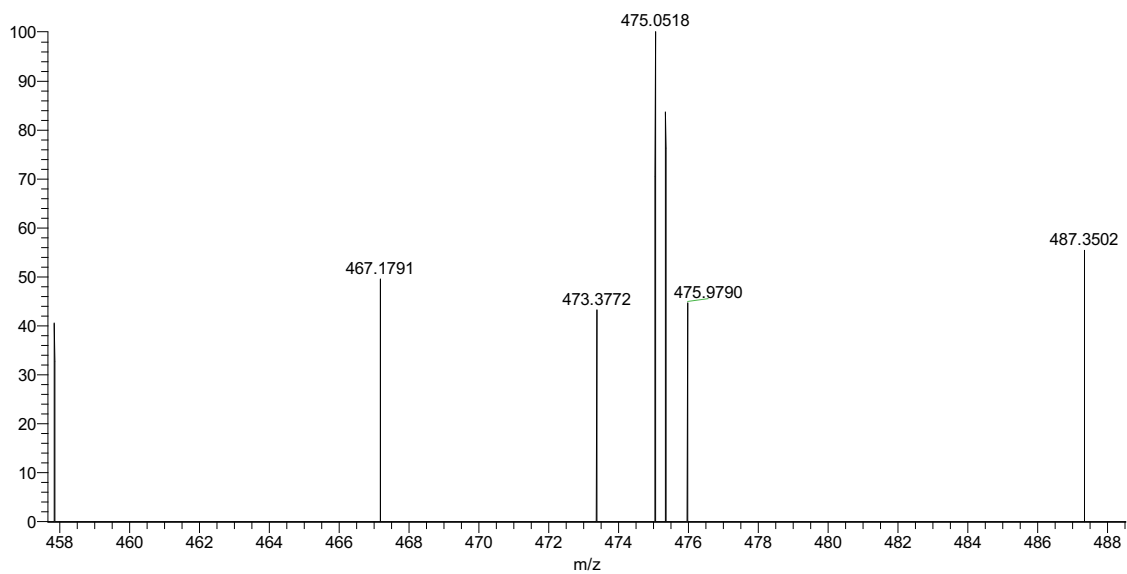

**Fig. S19.** High Resolution ESI-Mass spectrum of compound **5d**

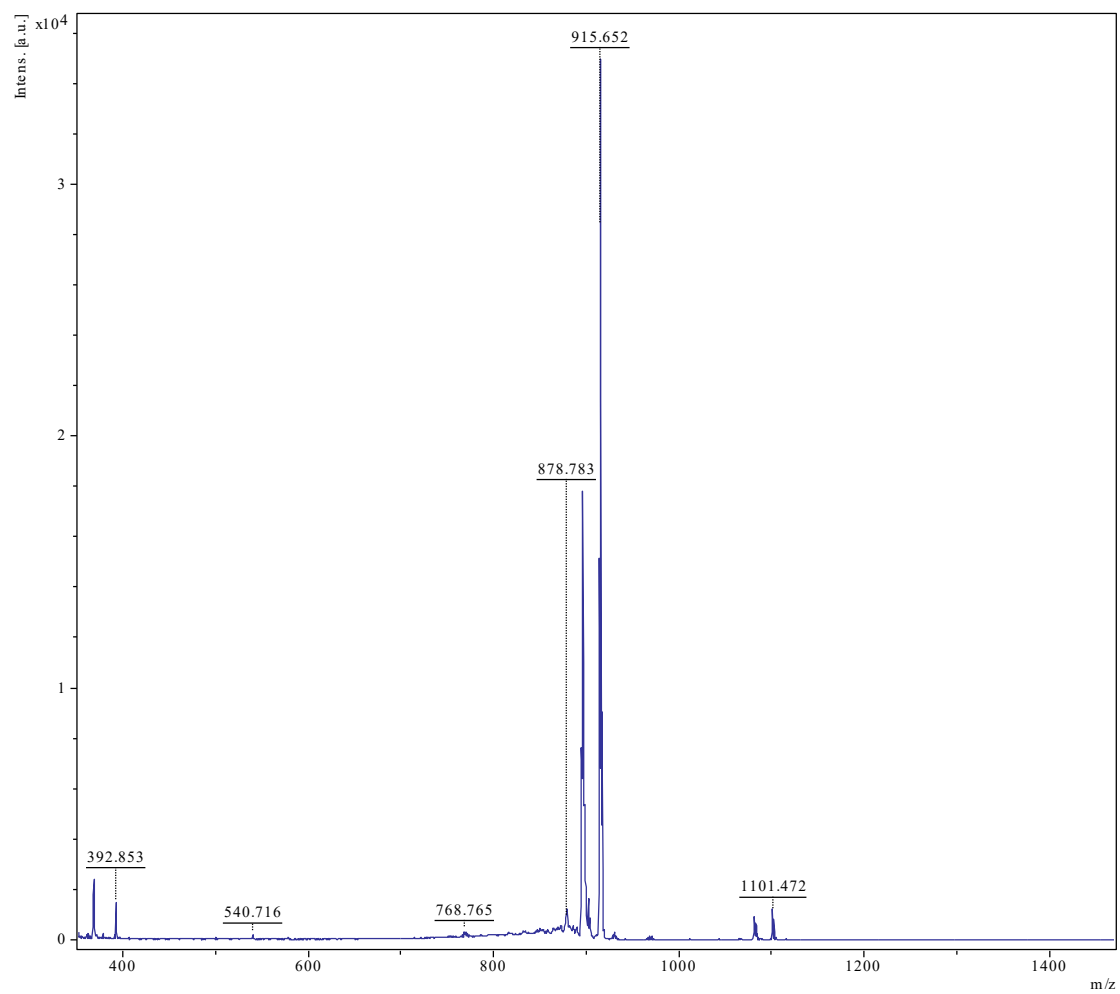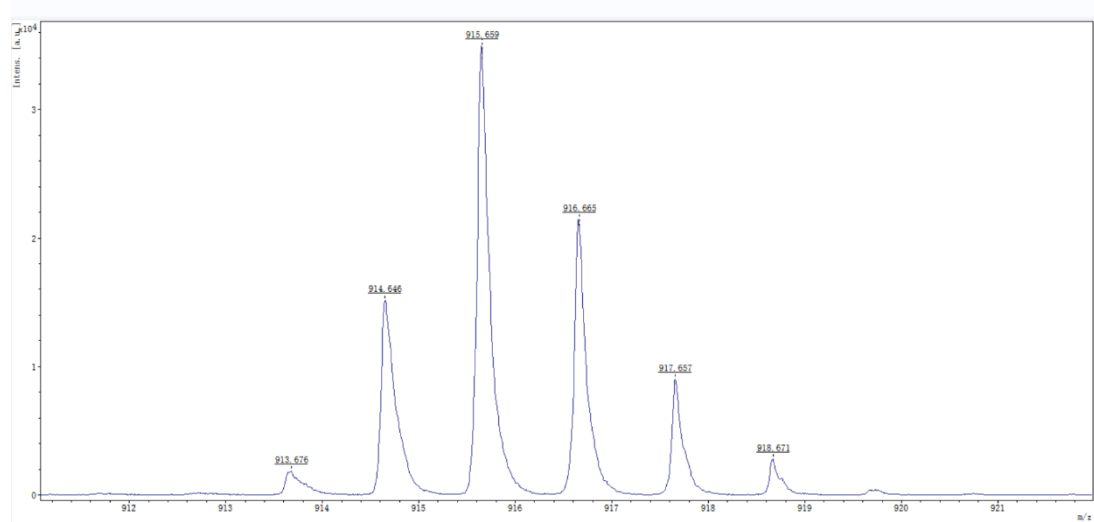

**Fig. S20.** MALDI-TOF MS spectrum of compound **6a**

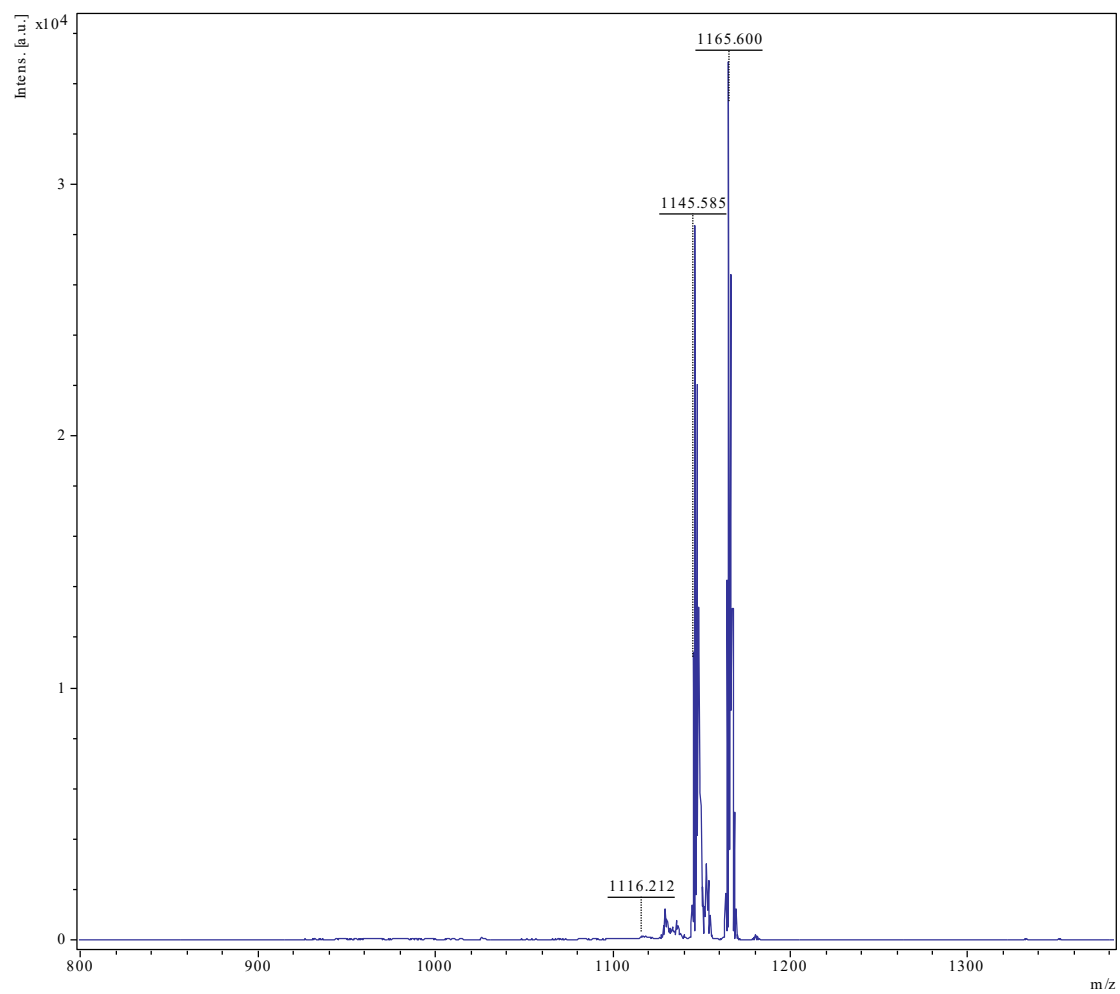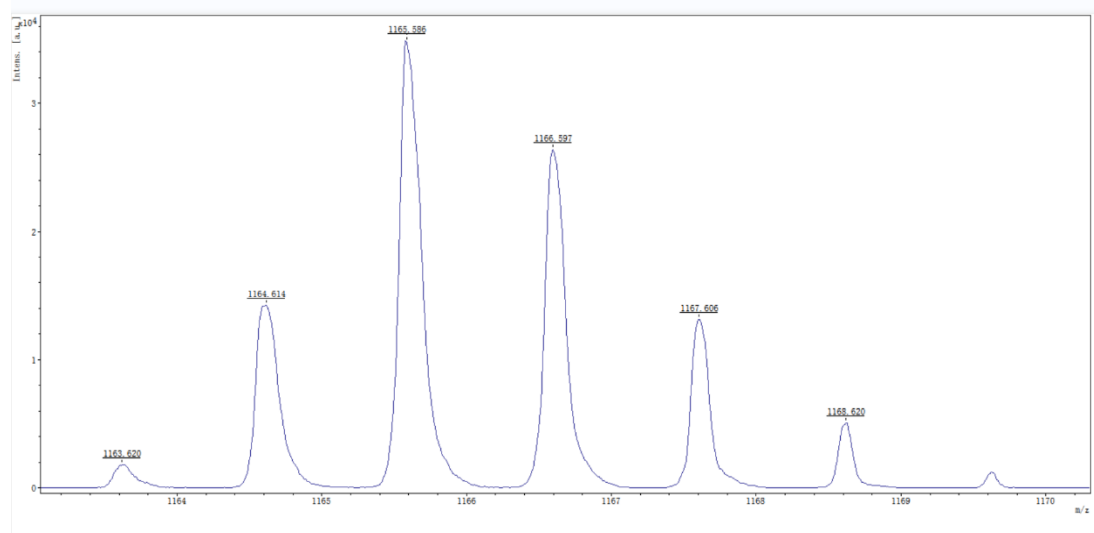

**Fig. S21.** MALDI-TOF MS spectrum of compound **6b**



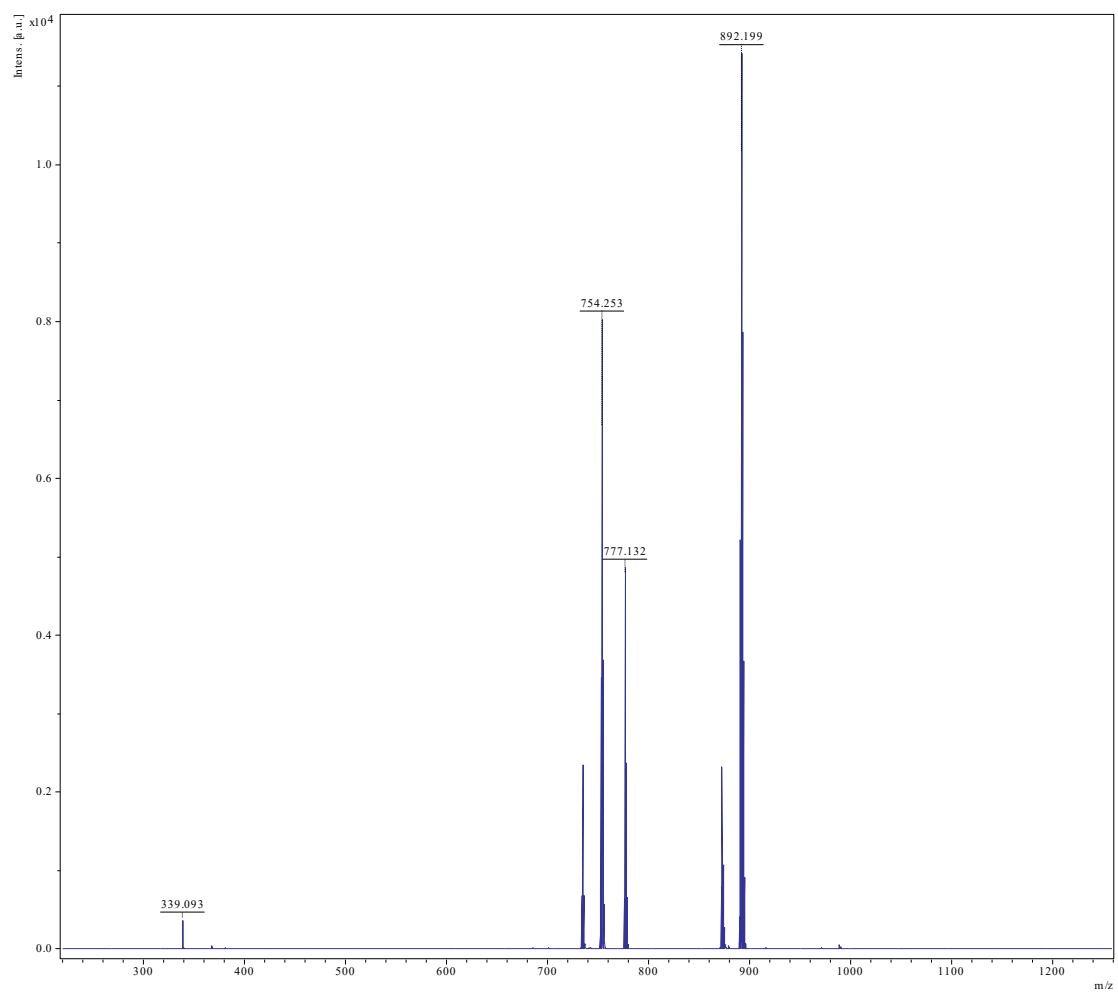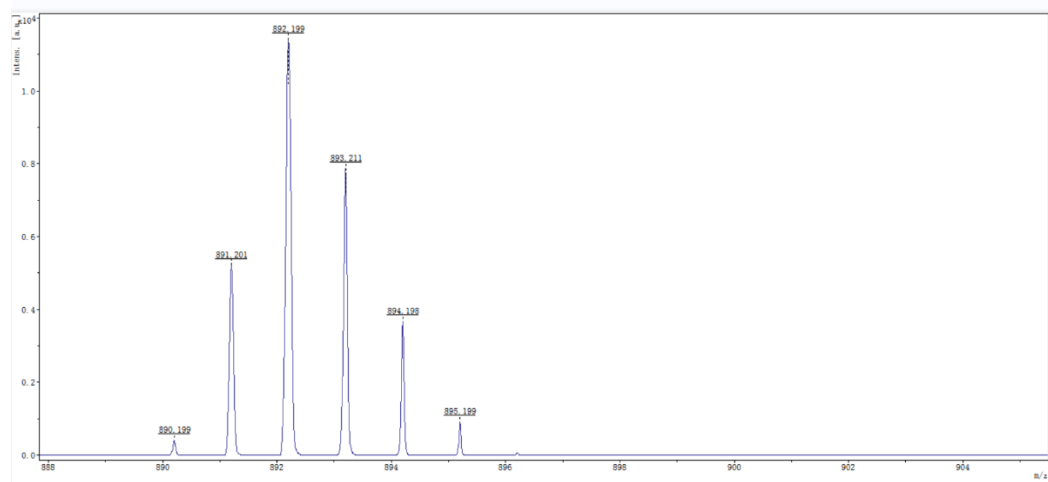

**Fig. S22.** MALDI-TOF MS spectrum of compound **6c**

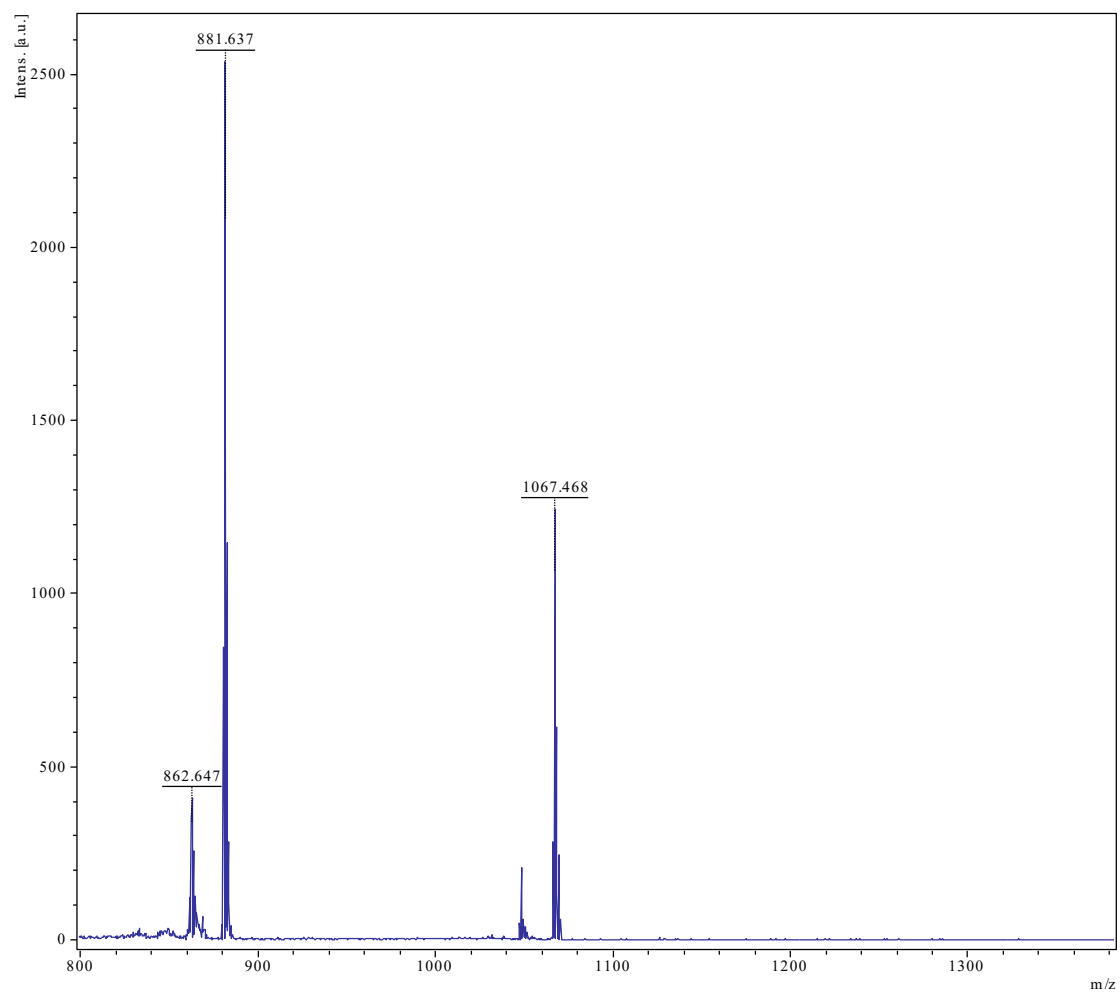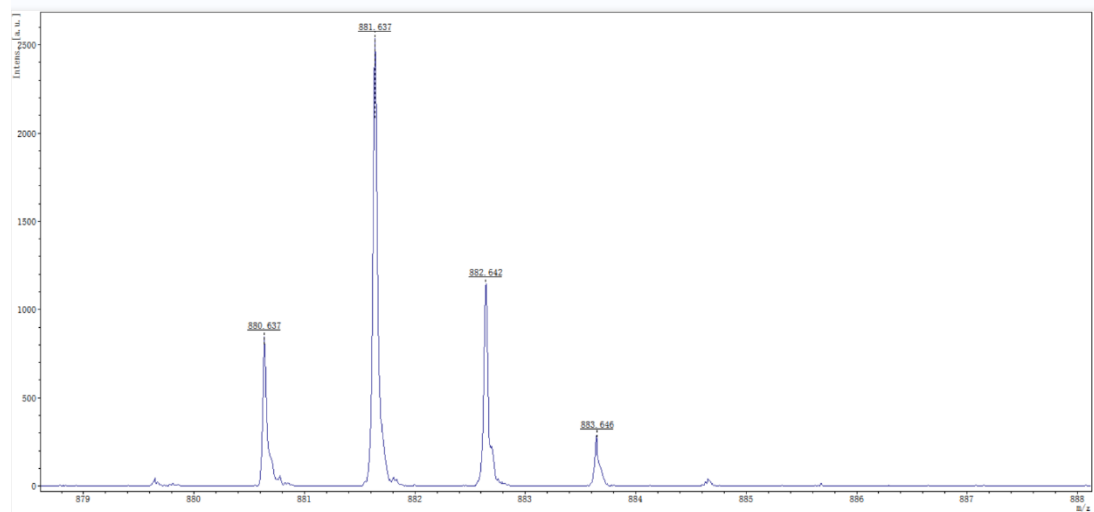

**Fig. S23.** MALDI-TOF MS spectrum of compound **6d**

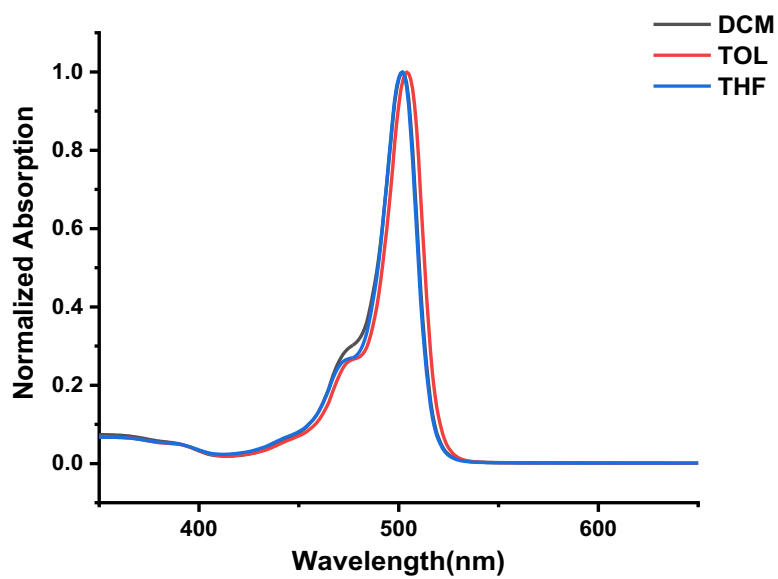

Fig. S24. Normalized Emission spectra of compound **4a** in different solvents

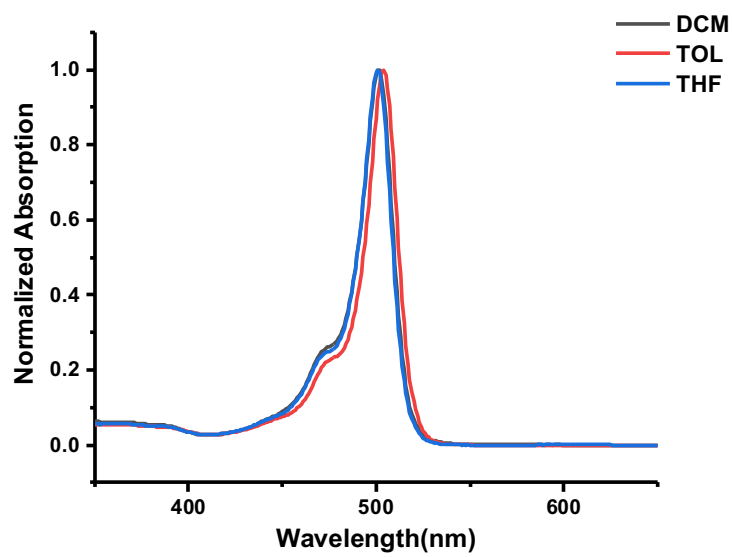

Fig. S25. Normalized Emission spectra of compound **4b** in different solvents

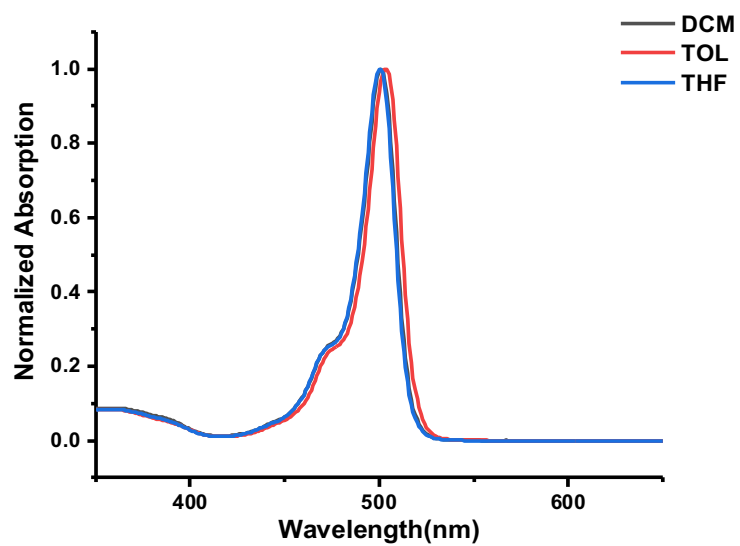

**Fig. S26.** Normalized Emission spectra of compound **4c** in different solvents

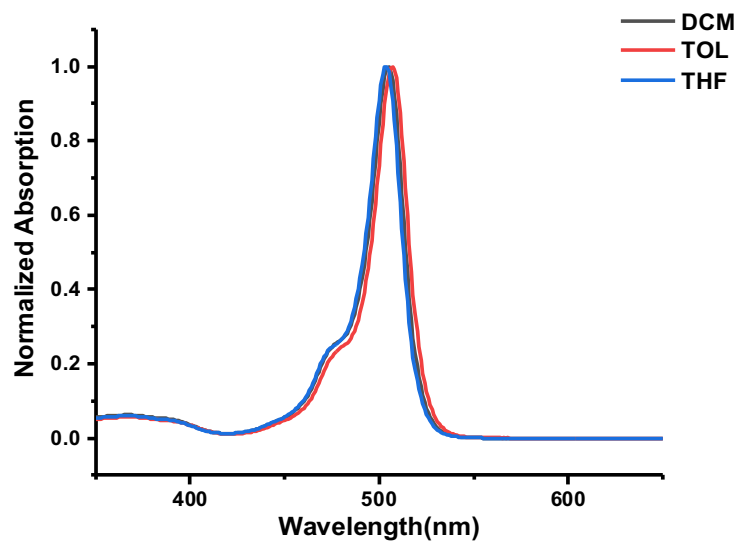

**Fig. S27.** Normalized Emission spectra of compound **4d** in different solvents

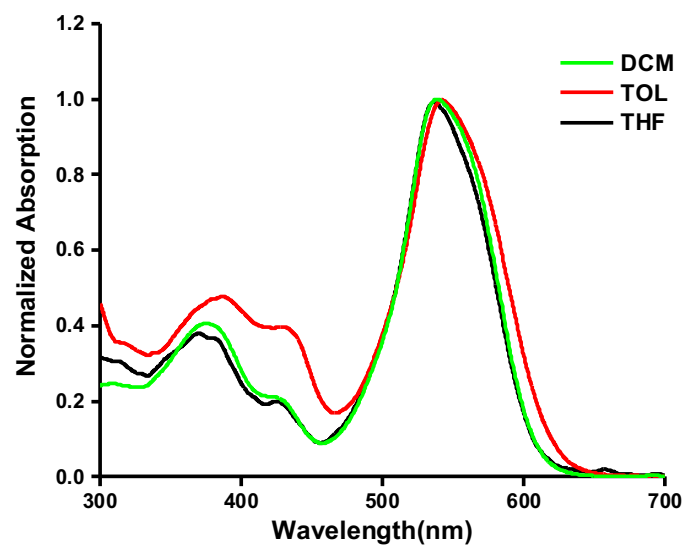

Fig. S28. UV-vis spectra of compound **6a** in different solvents

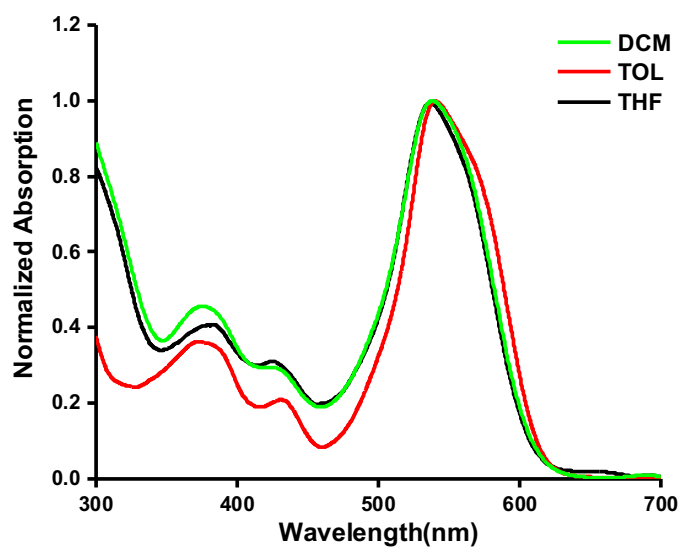

Fig. S29. UV-vis spectra of compound **6b** in different solvents

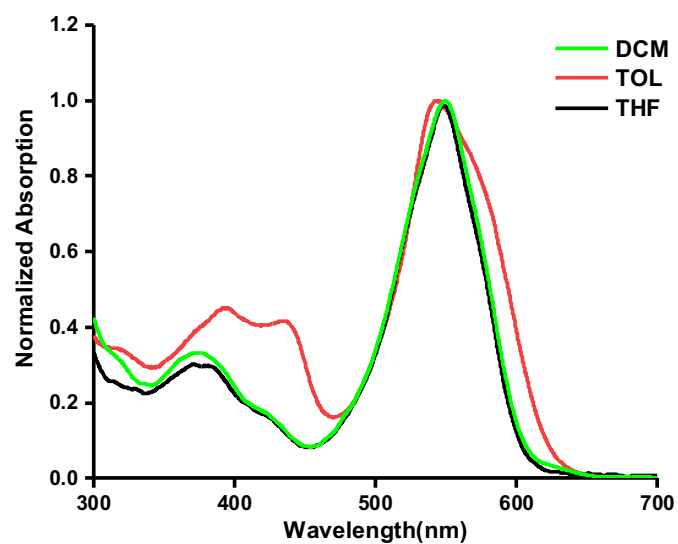

Fig. S30. UV-vis spectra of compound 6c in different solvents

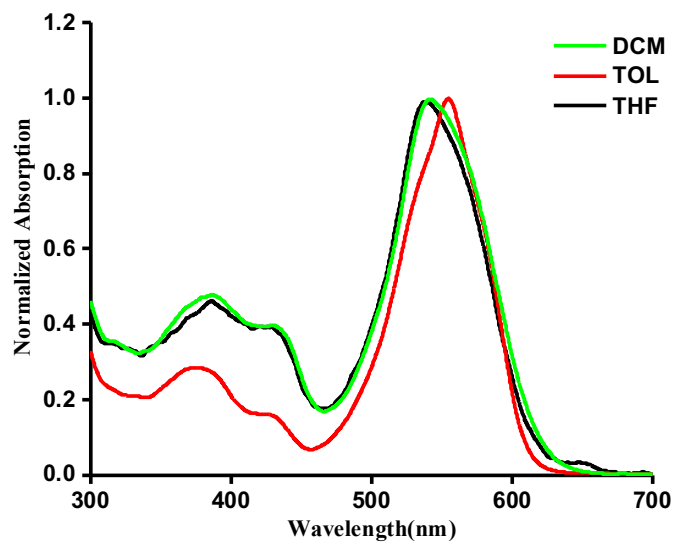

Fig. S31. UV-vis spectra of compound 6d in different solvents

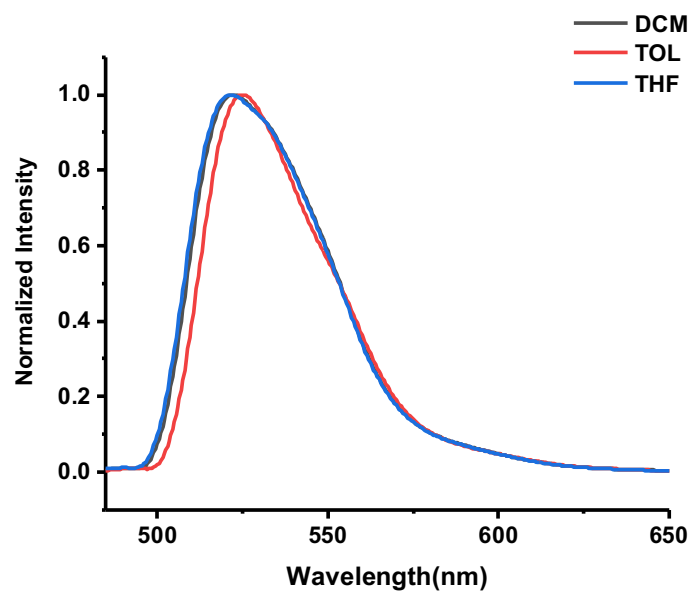

**Fig. S32.** Normalized Emission spectra of compound **4a** in different solvents

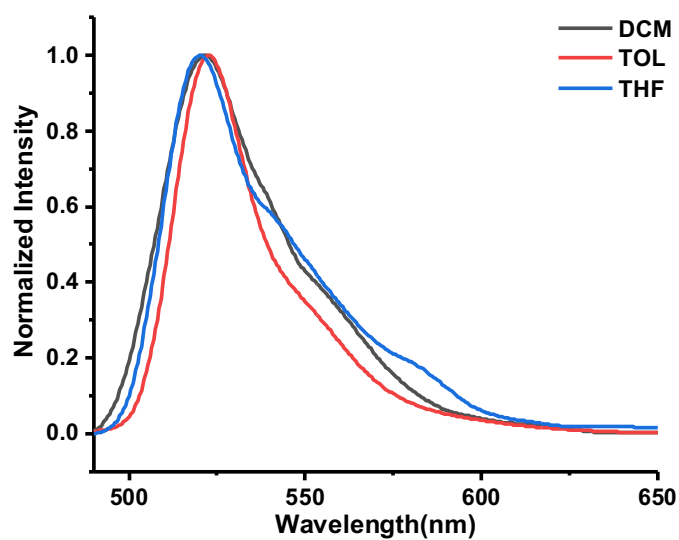

**Fig. S33.** Normalized Emission spectra of compound **4b** in different solvents

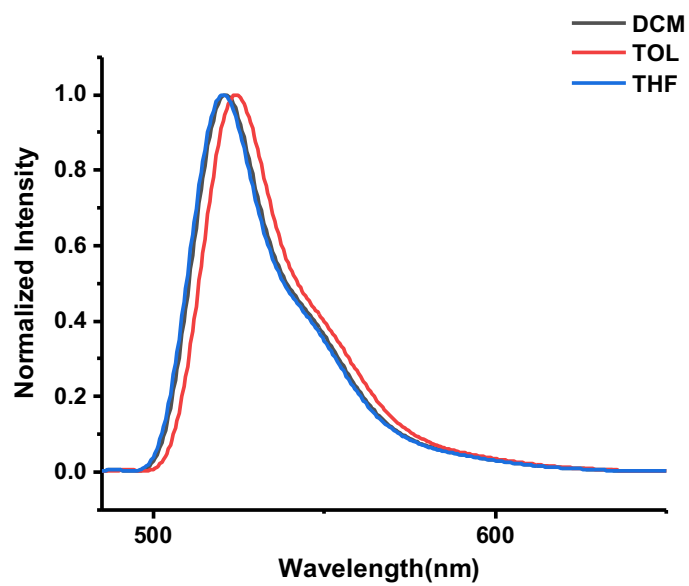

**Fig. S34.** Normalized Emission spectra of compound **4c** in different solvents

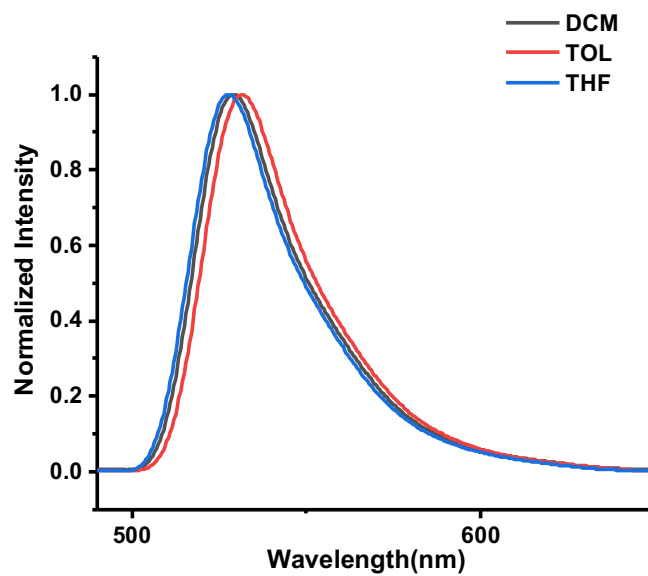

**Fig. S35.** Normalized Emission spectra of compound **4d** in different solvents



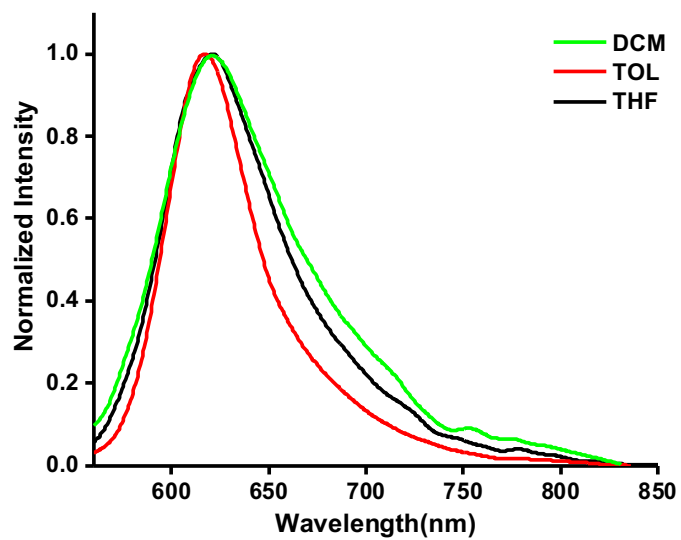

Fig. S36. Normalized Emission spectra of compound **6a** in different solvents

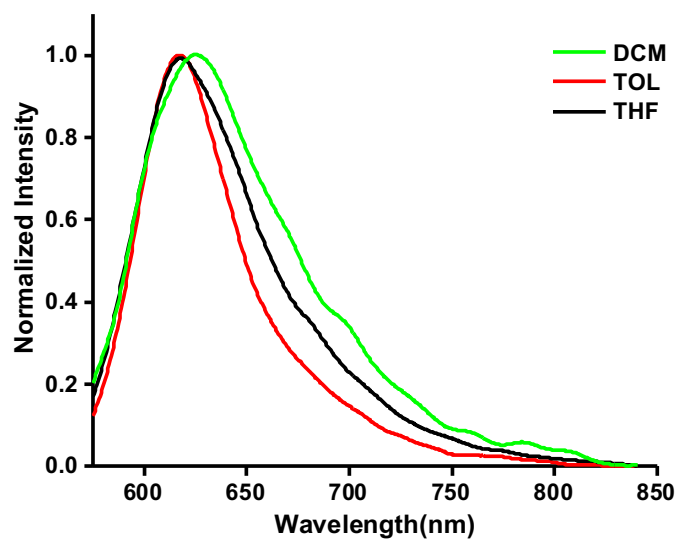

Fig. S37. Normalized Emission spectra of compound **6b** in different solvents

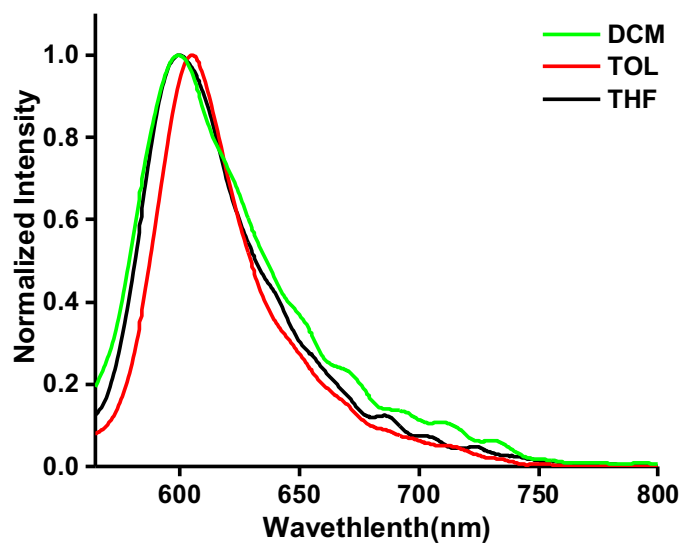

**Fig. S38.** Normalized Emission spectra of compound **6c** in different solvents

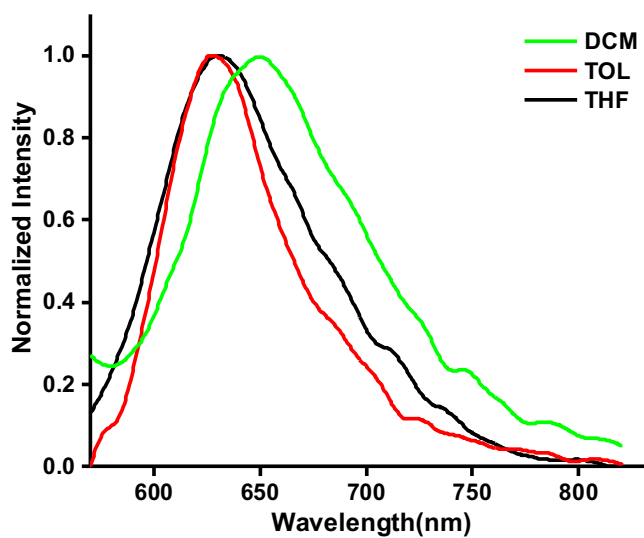

**Fig. S39.** Normalized Emission spectra of compound **6d** in different solvents

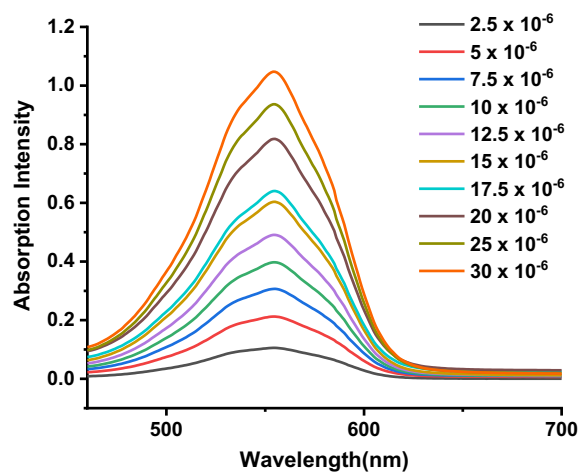

**Fig. S40.** UV-vis spectra of compound **6c** in different concentrations in toluene

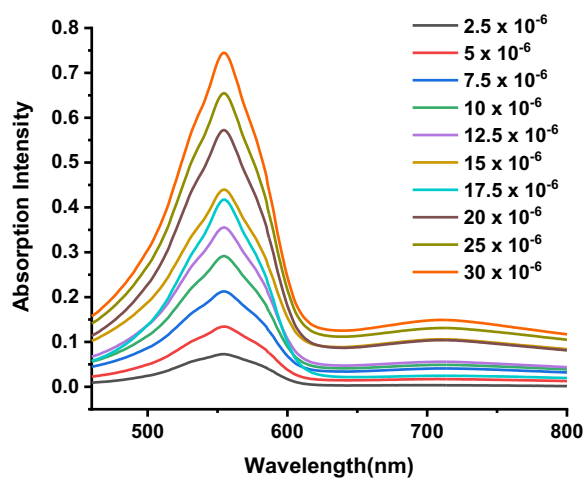

**Fig. S41.** UV-vis spectra of compound **6d** in different concentrations in toluene

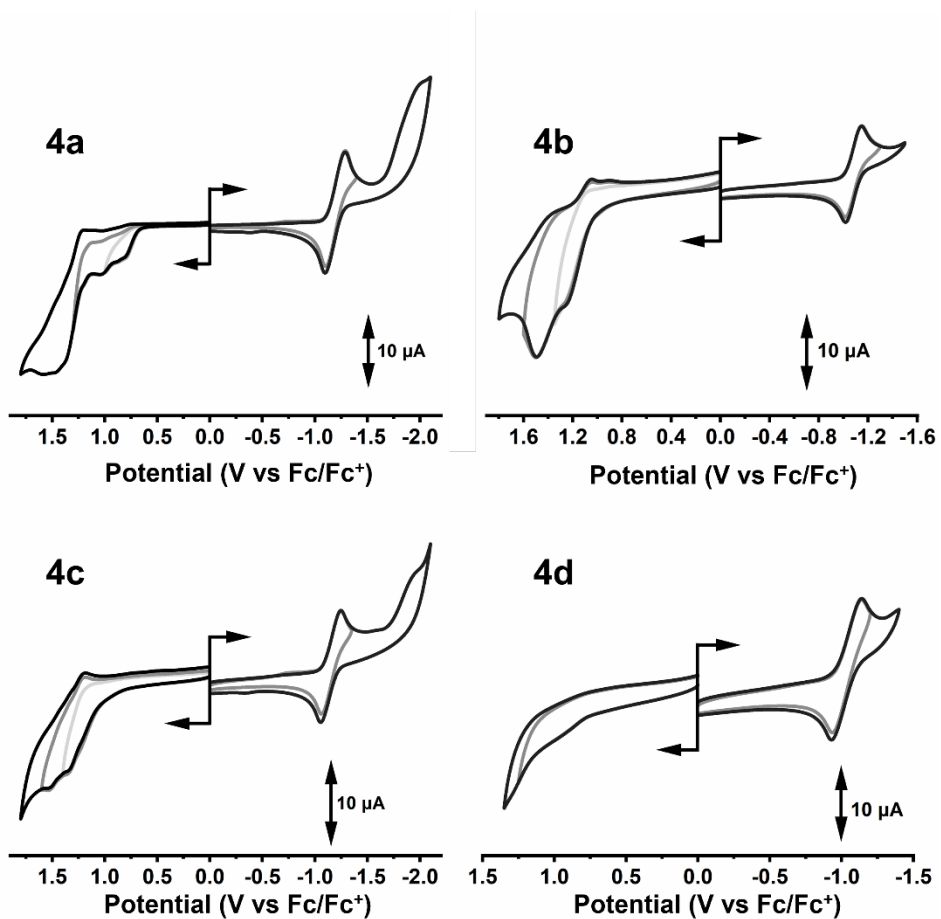

**Fig. S42.** Cyclic voltammograms of compounds **4a-4d** in CH<sub>2</sub>Cl<sub>2</sub> containing 0.1 M TBAP at scan speed of 0.1 V/s

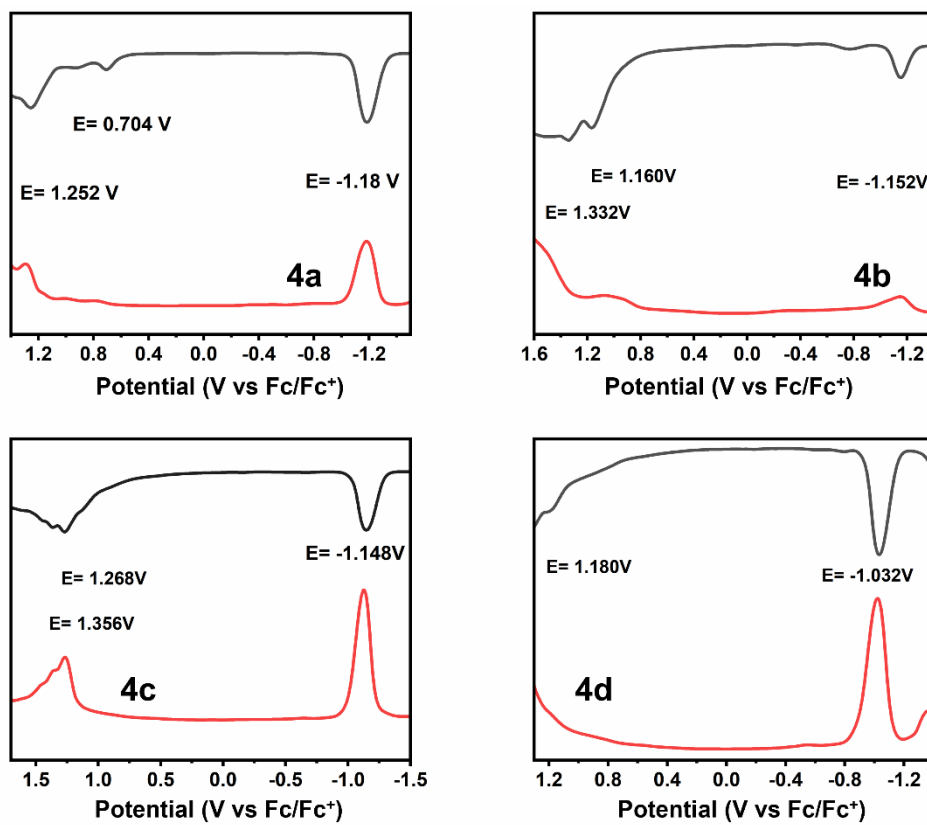

Fig. S43. DPV of compounds 4a-4d

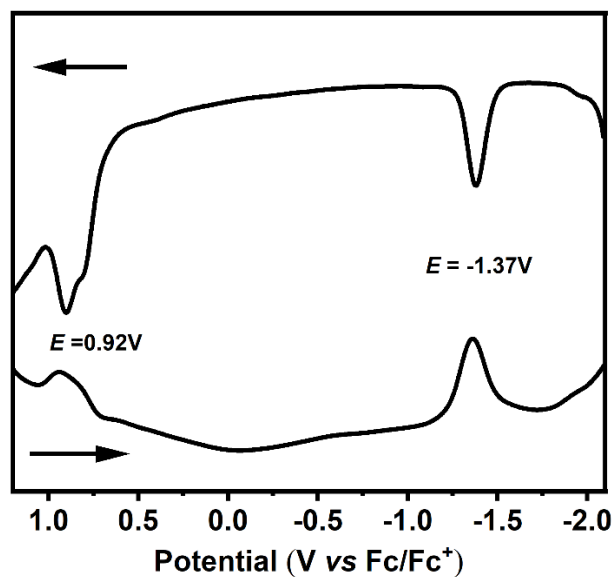

Fig. S44. DPV of compound 6a

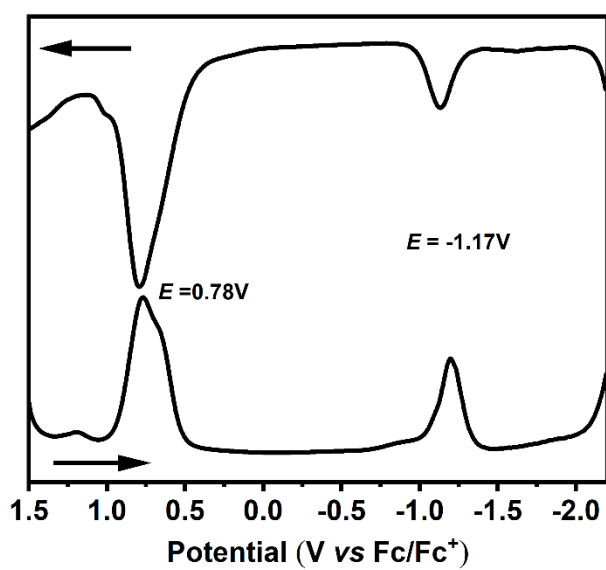

Fig. S45. DPV of compound **6b**

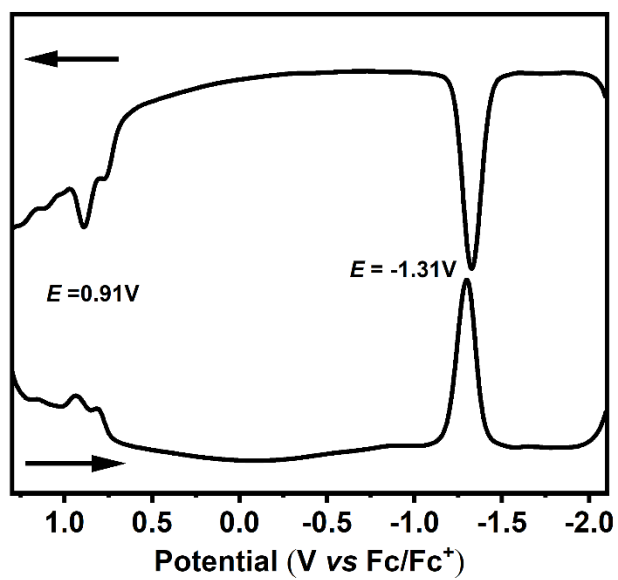

Fig. S46. DPV of compound **6c**

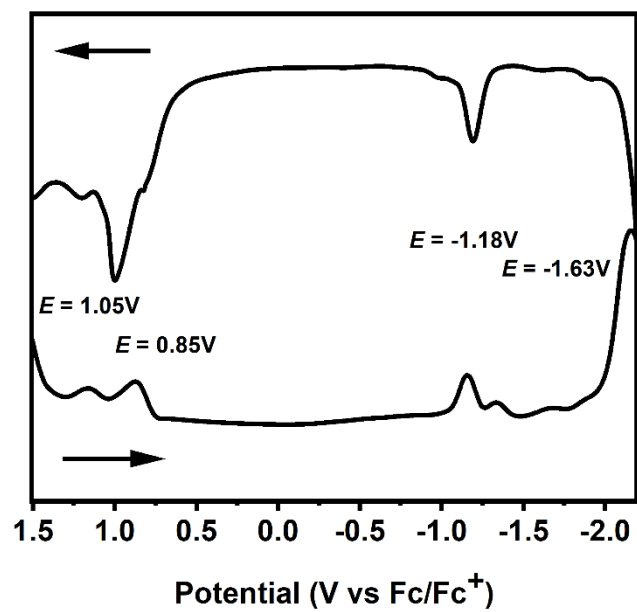

Fig. S47. DPV of compound 6d
